# Supplementary material for: A Natural Language Processing–Based Approach for Identifying Hospitalizations for Worsening Heart Failure Within an Integrated Health Care Delivery System
Source: PubMed Central journal article supplement — JAMA Netw Open. 2021 Nov 22;4(11):e2135152. doi: 10.1001/jamanetworkopen.2021.35152 (PMC8609413; doi:10.1001/jamanetworkopen.2021.35152), 2021-11-22
Supplement: jamanetwopen-e2135152-s001.pdf [file jamanetwopen-e2135152-s001.pdf]

## Supplementary Online Content

Ambrosy AP, Parikh RV, Sung SH, et al. A natural language processing–based approach for identifying hospitalizations for worsening heart failure within an integrated health care delivery system. *JAMA Netw Open*. 2021;4(11):e2135152. doi:10.1001/jamanetworkopen.2021.35152

**eTable 1.** Specific Criteria Used to Assess for the Presence of Worsening Heart Failure

**eTable 2.** Operational Ontologies for Specific Criteria Included the Definition of Worsening Heart Failure Using Natural Language Processing (NLP)

**eTable 3.** Performance of Natural Language Processing (NLP) Queries for Specific Criteria Included the Definition of Worsening Heart Failure as Compared to Physician Manual Adjudication of Medical Records in the Validation Sample of 200 Hospitalizations

**eTable 4.** Baseline Characteristics of the Cohort Based on Principal or Secondary Discharge Diagnosis of Heart Failure and Confirmed Worsening Heart Failure (WHF) Status by Natural Language Processing (NLP) Algorithm (ie, Mutually Exclusive Categories)

**eTable 5.** List of Top 300 Principal Diagnoses for Hospitalizations for Worsening Heart Failure With a Secondary Discharge Diagnosis Code for Heart Failure

**eTable 6.** Point Estimates and Associated 95% Confidence Intervals for Temporal Trends in Hospitalizations for Worsening Heart Failure, Overall and Stratified by Left Ventricular Ejection Fraction Category (Corresponding to Manuscript Figures 3 And 4)

**eFigure 1.** Major Diagnostic Categories for the Principal Discharge Diagnosis for Admissions With Heart Failure as a Secondary Discharge Diagnosis Identified as Meeting the Definition for Worsening Heart Failure

**eFigure 2.** Temporal Trends in Hospitalizations for Heart Failure Based on Principal Discharge Diagnosis and Diagnostic Criteria for Worsening Heart Failure for (A) Heart Failure With an Ejection Fraction Between 40-60% and (B) Heart Failure With and Ejection Fraction  $\geq 60\%$

**eFigure 3.** All-Cause and Cause-Specific Readmission Rates Based on Principal Discharge Diagnosis and Diagnostic Criteria for Worsening Heart Failure

**This supplementary material has been provided by the authors to give readers additional information about their work.**

**eTable 1.** Specific Criteria Used to Assess for the Presence of Worsening Heart Failure

| Worsening heart failure definition: $\geq 1$ Symptom, $\geq 2$ Objective Findings (including $\geq 1$ sign), AND $\geq 1$ change in therapy |                           |                                 |                                                              |
|---------------------------------------------------------------------------------------------------------------------------------------------|---------------------------|---------------------------------|--------------------------------------------------------------|
| Symptoms                                                                                                                                    | Signs                     | Objective findings              | Changes in therapy                                           |
| Dyspnea/shortness of breath                                                                                                                 | Lower extremity edema     | Tachycardia (HR $>100$ bpm)     | New administration of IV diuretic ( $\geq 2$ doses)          |
| Orthopnea                                                                                                                                   | Pulmonary rales/wheezing  | BNP $\geq 100$ ng/L             | Receipt of hemodialysis/continuous renal replacement therapy |
| Paroxysmal nocturnal dyspnea                                                                                                                | Jugular venous distension | Pulmonary edema on chest X-ray  |                                                              |
| Fatigue                                                                                                                                     | Third heart sound (S3)    | Pleural effusion on chest X-ray |                                                              |
| Recent weight gain/bloating                                                                                                                 | Hepatomegaly              | Cardiomegaly on chest X-ray     |                                                              |
| Tachypnea/respiratory effort                                                                                                                | Abdominal swelling        |                                 |                                                              |

**Abbreviations:** HR = heart rate; BNP = b-type natriuretic peptide; IV = intravenous.

**eTable 2.** Operational Ontologies for Specific Criteria Included the Definition of Worsening Heart Failure Using Natural Language Processing (NLP)

\*indicates any character

^indicates including common word variations and conjugates

| NLP query                    | Ontology                                                                                                                                                                                                                                               |
|------------------------------|--------------------------------------------------------------------------------------------------------------------------------------------------------------------------------------------------------------------------------------------------------|
| Shortness of breath          | shor*s* of breath<br>*dys*n*ea<br>breathless*<br>SOB<br>DOE<br>SOBOE<br>difficult* breathing (unordered)<br>Regex: dysp[^h]w*c                                                                                                                         |
| Orthopnea                    | Orthopnea<br>[shortness of breath term] [lay*, lie, ly*] [down, flat] (3 words, unordered)<br>Pillow sleep (3 words, unordered)                                                                                                                        |
| Paroxysmal nocturnal dyspnea | parox* nocturnal [dyspnea term]<br>PND<br>[Negated: clinical negations, morning, today, doesn't, (number) am] *wak* [shortness of breath term]<br>[Negated: clinical negations, morning, today, doesn't, (number) am] *wok* [shortness of breath term] |
| Fatigue                      | fatigue<br>letharg*<br>no/low energy<br>[Negated: body part term, neuro*, R, L] weakness                                                                                                                                                               |
| Weight gain                  | weight gain* (3 words, unordered)<br>wt gain* (3 words, unordered)<br>weight retain^ (3 words, unordered)<br>wt retain^ (3 words, unordered)                                                                                                           |
| Tachypnea                    | tach*n*<br>[respiratory, ambulation, breathe^] [effort, work, hard, rapid, distress, labor*, difficult*] [Negated: normal, good, nl*, unlabored] (3 words, unordered)<br>Increa* resp* rate                                                            |
| Rales                        | crackl*<br>rhonc*<br>rale*<br>wheez*<br>crepitus                                                                                                                                                                                                       |
| Third heart sound            | third* heart sound<br>s3<br>s3+                                                                                                                                                                                                                        |

| NLP query                            | Ontology                                                                                                                                                                                                                                                                                                                                                                                                                                                                                                                                                                                                                                                                                                                                                                                  |
|--------------------------------------|-------------------------------------------------------------------------------------------------------------------------------------------------------------------------------------------------------------------------------------------------------------------------------------------------------------------------------------------------------------------------------------------------------------------------------------------------------------------------------------------------------------------------------------------------------------------------------------------------------------------------------------------------------------------------------------------------------------------------------------------------------------------------------------------|
|                                      | s3,*<br>gall*p*                                                                                                                                                                                                                                                                                                                                                                                                                                                                                                                                                                                                                                                                                                                                                                           |
| Lower extremity edema                | edema*<br>oedema*<br>swell*<br>fluid retain^<br>Additional negations: (body part term except [pedal, leg, ankle*, shin, *calf, knee, BLE, RLE, LLE]), pulm*, subcut*, scrot*, scort*, UE, LUE, RUE, dorsal, tongue, shoulder, CXR                                                                                                                                                                                                                                                                                                                                                                                                                                                                                                                                                         |
| Jugular venous distension            | jug* diste*n*<br>[jug*, neck] [venous, vei*] diste*n*<br>*jvd*<br>*jvp*<br>[elev*, incr*] [venous pressure*, vei* pressure*]<br>Additional negations: flat, marginal, [not, hard, unable, can't*, cannot*, difficult] [appre*, asses*, examin*, see*, perceive, elevate*, determine, ascertain, visual*e, judge, visible*, evaluate*, discern]                                                                                                                                                                                                                                                                                                                                                                                                                                            |
| Hepatomegaly                         | hepato*aly*<br>enlarge^ [no negation] liver (4 words)<br>[Negated: /, S1, S2, S3, S4, rhythm, rrr, mu*r*] HSM                                                                                                                                                                                                                                                                                                                                                                                                                                                                                                                                                                                                                                                                             |
| Abdominal swelling                   | [Negated: IVC, EJ, [JVD term]] distend^<br>[Negated: IVC, EJ, [JVD term]] abd* [Negated: body parts] swell^ edema                                                                                                                                                                                                                                                                                                                                                                                                                                                                                                                                                                                                                                                                         |
| Pulmonary edema (on CXR notes only)  | [pulmonary, interst*, alveolar, air*, vascular] [*dema, congestion, infiltrate]<br>kerley B line*<br>opacities^                                                                                                                                                                                                                                                                                                                                                                                                                                                                                                                                                                                                                                                                           |
| Pleural effusion (on CXR notes only) | pl*u*r* [eff*s*n*, fluid]<br>[Negated: pericardial] eff*s*n*                                                                                                                                                                                                                                                                                                                                                                                                                                                                                                                                                                                                                                                                                                                              |
| Cardiomegaly (on CXR notes only)     | Cardiomegaly<br>[enlarge^, large^, prominent^] [heart, card*, chamber]                                                                                                                                                                                                                                                                                                                                                                                                                                                                                                                                                                                                                                                                                                                    |
| Clinical Negations                   | Regex: \d+\d+\d+ (dates)<br>Regex: \d+\d+<br>Regex: [^a-zA-Z\d\s:]no<br>(-)<br>[-]<br>no<br>[can "can be" could "could be" should "should be" must "must be" would "would be" will "will be" was] rules*<br>[him her patient pt "the patient" "the pt"] out for<br>[can "can be" could "could be" should "should be" must "must be" would "would be" will "will be" was] rules*<br>[him her patient pt "the patient" "the pt"] out<br>not reveal<br>rules* the patient out for<br>[can "can be" could "could be" should "should be" must "must be" would "would be" will "will be" was] rules*<br>out<br>sufficient to rules* [him her patient pt "the patient" "the pt"] out<br>adequate to rules* the patient out against<br>rules* [him her patient pt "the patient" "the pt"] out for |

| NLP query | Ontology                                                                                                                                                                                                                                                                                                                                                                                                                                                                                                                                                                                                                                                                                                                                                                                                                                                                                                                                                                                                                                                                                                                                                                                                                                                                                                                                                                                                                                                                                                                                                                                                                                                                                                                         |
|-----------|----------------------------------------------------------------------------------------------------------------------------------------------------------------------------------------------------------------------------------------------------------------------------------------------------------------------------------------------------------------------------------------------------------------------------------------------------------------------------------------------------------------------------------------------------------------------------------------------------------------------------------------------------------------------------------------------------------------------------------------------------------------------------------------------------------------------------------------------------------------------------------------------------------------------------------------------------------------------------------------------------------------------------------------------------------------------------------------------------------------------------------------------------------------------------------------------------------------------------------------------------------------------------------------------------------------------------------------------------------------------------------------------------------------------------------------------------------------------------------------------------------------------------------------------------------------------------------------------------------------------------------------------------------------------------------------------------------------------------------|
|           | <p> sufficient to rules* the patient out for<br/> ought to be rules* out for<br/> rules* out<br/> not associated with<br/> resolved<br/> discontinue<br/> did rules* out<br/> rules* [him her patient pt "the patient" "the pt"] out against<br/> cannot<br/> negative for<br/> sufficient to rules* [him her patient pt "the patient" "the pt"] out against<br/> no suggestion of<br/> not<br/> rules* [him her patient pt "the patient" "the pt"] out<br/> adequate to rules* [him her patient pt "the patient" "the pt"] out<br/> did rules* the patient out against<br/> [him her patient pt "the patient" "the pt"] was not<br/> no suspicious<br/> no evidence to suggest<br/> declines*<br/> [can "can be" could "could be" should "should be" must "must be" would "would be" will "will be" was] rules*<br/> the patient out for<br/> did rules* the patient out<br/> sufficient to rules* [him her patient pt "the patient" "the pt"] out for<br/> not had<br/> adequate to rules* out<br/> no other evidence<br/> test for<br/> [can "can be" could "could be" should "should be" must "must be" would "would be" will "will be" was] rules*<br/> the patient out against<br/> didn't want to<br/> declined<br/> denies<br/> [can "can be" could "could be" should "should be" must "must be" would "would be" will "will be" was] rules*<br/> the patient out<br/> borderline<br/> avoid<br/> [can "can be" could "could be" should "should be" must "must be" would "would be" will "will be" was] rules*<br/> [him her patient pt "the patient" "the pt"] out against<br/> rat[him her patient pt "the patient" "the pt"] than<br/> not exhibit<br/> checked for<br/> did rules* the patient out for<br/> -ve </p> |

| NLP query | Ontology                                                                                                                                                                                                                                                                                                                                                                                                                                                                                                                                                                                                                                                                                                                                                                                                                                                                                                                                                                                                                                                                                                                                                                                                                                                                                                                                                                                                                                                                                                                                                      |
|-----------|---------------------------------------------------------------------------------------------------------------------------------------------------------------------------------------------------------------------------------------------------------------------------------------------------------------------------------------------------------------------------------------------------------------------------------------------------------------------------------------------------------------------------------------------------------------------------------------------------------------------------------------------------------------------------------------------------------------------------------------------------------------------------------------------------------------------------------------------------------------------------------------------------------------------------------------------------------------------------------------------------------------------------------------------------------------------------------------------------------------------------------------------------------------------------------------------------------------------------------------------------------------------------------------------------------------------------------------------------------------------------------------------------------------------------------------------------------------------------------------------------------------------------------------------------------------|
|           | <p>denied<br/> evaluate for<br/> ro<br/> adequate to rules* the patient out for<br/> unwilling to<br/> might be rules* out for<br/> no findings to indicate<br/> should be rules* out for<br/> did rules* [him her patient pt "the patient" "the pt"] out against<br/> [can "can be" could "could be" should "should be" must "must be" would "would be" will "will be" was] rules*<br/> out against<br/> no [sign evidence suggestion appearance symptom "clinical symptom" "other symptom" ] of<br/> rules* out for<br/> will be rules* out for<br/> [without wo w/o "w / o" ] sign of<br/> eval for<br/> no new<br/> adequate to rules* the patient out<br/> no cause of<br/> sufficient to rules* the patient out against<br/> not have<br/> discontinued<br/> what must be rules* out is<br/> did rules* out against<br/> did rules* [him her patient pt "the patient" "the pt"] out for<br/> rules* the patient out against<br/> no new evidence<br/> no significant<br/> not know of<br/> may be rules* out for<br/> adequate to rules* [him her patient pt "the patient" "the pt"] out for<br/> free of<br/> sufficient to rules* the patient out<br/> is to be rules* out for<br/> rules* the patient out<br/> must be rules* out for<br/> no complaints of<br/> [without wo w/o "w / o" ] any evidence of<br/> [without wo w/o "w / o" ] indication of<br/> r/o<br/> no radiographic evidence of<br/> not appear<br/> [can "can be" could "could be" should "should be" must "must be" would "would be" will "will be" was] rules*<br/> out for</p> |

| NLP query | Ontology                                                                                                                                                                                                                                                                                                                                                                                                                                                                                                                                                                                                                                                                                                                                                                                                                                                                                                                                                                                                |
|-----------|---------------------------------------------------------------------------------------------------------------------------------------------------------------------------------------------------------------------------------------------------------------------------------------------------------------------------------------------------------------------------------------------------------------------------------------------------------------------------------------------------------------------------------------------------------------------------------------------------------------------------------------------------------------------------------------------------------------------------------------------------------------------------------------------------------------------------------------------------------------------------------------------------------------------------------------------------------------------------------------------------------|
|           | <p>[without wo w/o "w / o" ] evidence<br/> never had<br/> adequate to rules* out for<br/> not see<br/> fails to reveal<br/> to exclude<br/> rules* out against<br/> unremarkable for<br/> not feel<br/> not appreciate<br/> not complain of<br/> not demonstrate<br/> not to be<br/> not a candidate for<br/> be rules* out for<br/> absence of<br/> no mammographic evidence of<br/> denying<br/> deny*<br/> did rules* [him her patient pt "the patient" "the pt"] out<br/> cannot see<br/> no<br/> with no<br/> sufficient to rules* out<br/> no signs of<br/> no findings of<br/> not want to<br/> could be rules* out for<br/> r / o<br/> no abnormal<br/> did rules* out for<br/> [can "can be" could "could be" should "should be" must "must be" would "would be" will "will be" was] be<br/> rules* out for<br/> not known to have<br/> no evidence<br/> never developed<br/> [without wo w/o "w / o" ]<br/> sufficient to rules* out against<br/> sufficient to rules* out for<br/> never</p> |

**eTable 3.** Performance of Natural Language Processing (NLP) Queries for Specific Criteria Included the Definition of Worsening Heart Failure as Compared to Physician Manual Adjudication of Medical Records in the Validation Sample of 200 Hospitalizations

| <b>NLP query</b>               | <b>Adjudicated positive, n (%)</b> | <b>Sensitivity</b> | <b>Specificity</b> | <b>Positive predictive value</b> | <b>Negative predictive value</b> |
|--------------------------------|------------------------------------|--------------------|--------------------|----------------------------------|----------------------------------|
| Shortness of breath            | 119 (59.5)                         | 96.0               | 90.5               | 94.5                             | 93.1                             |
| Orthopnea                      | 40 (20)                            | 86.4               | 97.4               | 90.5                             | 96.2                             |
| Paroxysmal nocturnal dyspnea   | 15 (7.5)                           | 90.0               | 98.9               | 90                               | 98.9                             |
| Fatigue                        | 63 (31.5)                          | 86.5               | 99.1               | 98.7                             | 90.2                             |
| Weight gain                    | 23 (11.5)                          | 83.3               | 100                | 100                              | 97.1                             |
| Tachypnea                      | 64 (32)                            | 72.0               | 97.5               | 95.2                             | 83.3                             |
| Rales                          | 112 (56)                           | 96.8               | 96.0               | 97.6                             | 94.7                             |
| Third heart sound              | 2 (1)                              | 100                | 100                | 100                              | 100                              |
| Lower extremity edema          | 109 (54.5)                         | 94.5               | 91.8               | 95.2                             | 90.5                             |
| Jugular venous distension      | 35 (17.5)                          | 88.1               | 97.5               | 90.2                             | 96.9                             |
| Hepatomegaly                   | 1 (0.5)                            | 100                | 100                | 100                              | 100                              |
| Abdominal swelling             | 28 (14)                            | 86.5               | 98.8               | 94.1                             | 97                               |
| Pulmonary edema                | 81 (40.5)                          | 88.9               | 99.0               | 98.9                             | 90.1                             |
| Pleural effusion               | 79 (39.5)                          | 88.4               | 98.3               | 97.4                             | 91.8                             |
| Cardiomegaly                   | 88 (44)                            | 88.2               | 100                | 100                              | 90.7                             |
| <b>Structured data element</b> |                                    |                    |                    |                                  |                                  |
| Hypoxemia (<92%)               | 95 (47.5)                          | 78.7               | 100                | 100                              | 73                               |
| Tachycardia (>100 bpm)         | 50 (25)                            | 98.1               | 100                | 100                              | 97.9                             |
| Elevated BNP (>100 ng/L)       | 127 (63.5)                         | 95.3               | 95.9               | 97.6                             | 92.1                             |
| Therapy (IV diuretics/CRRT)    | 138 (69)                           | 74.6               | 95.2               | 97.2                             | 62.8                             |



**eTable 4.** Baseline Characteristics of the Cohort Based on Principal or Secondary Discharge Diagnosis of Heart Failure and Confirmed Worsening Heart Failure (WHF) Status by Natural Language Processing (NLP) Algorithm (ie, Mutually Exclusive Categories)

| Characteristics, n (%)                      | WHF with Primary Discharge Diagnosis (N=58,042) | WHF with Secondary Discharge Diagnosis (N=62,764) | No WHF with Primary Discharge Diagnosis (N=7,315) | No WHF with Secondary Discharge Diagnosis (N=159,871) |
|---------------------------------------------|-------------------------------------------------|---------------------------------------------------|---------------------------------------------------|-------------------------------------------------------|
| <b>Demographics</b>                         |                                                 |                                                   |                                                   |                                                       |
| Age, years, mean (SD)                       | 75.2 (13.7)                                     | 75.0 (13.2)                                       | 74.0 (14.7)                                       | 76.1 (12.7)                                           |
| Gender                                      |                                                 |                                                   |                                                   |                                                       |
| Men                                         | 30,587 (52.7)                                   | 31,775 (50.6)                                     | 3821 (52.2)                                       | 81,020 (50.7)                                         |
| Women                                       | 27,452 (47.3)                                   | 30,982 (49.4)                                     | 3494 (47.8)                                       | 78,837 (49.3)                                         |
| Other                                       | 1 (0.0)                                         | 1 (0.0)                                           | 0 (0.0)                                           | 2 (0.0)                                               |
| Unknown/Not Reported                        | 2 (0.0)                                         | 6 (0.0)                                           | 0 (0.0)                                           | 12 (0.0)                                              |
| Self-reported race                          |                                                 |                                                   |                                                   |                                                       |
| White                                       | 32,707 (56.4)                                   | 38,744 (61.7)                                     | 4147 (56.7)                                       | 100,242 (62.7)                                        |
| Black                                       | 8911 (15.4)                                     | 6562 (10.5)                                       | 1176 (16.1)                                       | 18,254 (11.4)                                         |
| Asian/Pacific Islander                      | 6253 (10.8)                                     | 6850 (10.9)                                       | 806 (11.0)                                        | 14,542 (9.1)                                          |
| Multiracial                                 | 4639 (8.0)                                      | 4899 (7.8)                                        | 565 (7.7)                                         | 13,349 (8.3)                                          |
| American Indian/Alaska Native               | 299 (0.5)                                       | 376 (0.6)                                         | 32 (0.4)                                          | 948 (0.6)                                             |
| Unknown                                     | 5233 (9.0)                                      | 5333 (8.5)                                        | 589 (8.1)                                         | 12,536 (7.8)                                          |
| Hispanic ethnicity                          | 3145 (5.4)                                      | 3902 (6.2)                                        | 374 (5.1)                                         | 7524 (4.7)                                            |
| <b>Heart failure characteristics</b>        |                                                 |                                                   |                                                   |                                                       |
| Left ventricular ejection fraction category |                                                 |                                                   |                                                   |                                                       |
| <40%                                        | 18,701 (32.2)                                   | 13,471 (21.5)                                     | 2601 (35.6)                                       | 25,094 (15.7)                                         |
| 40-49%                                      | 7389 (12.7)                                     | 7601 (12.1)                                       | 847 (11.6)                                        | 17,522 (11.0)                                         |
| ≥50%                                        | 27,755 (47.8)                                   | 34,973 (55.7)                                     | 2975 (40.7)                                       | 76,647 (47.9)                                         |
| Unknown                                     | 4197 (7.2)                                      | 6719 (10.7)                                       | 892 (12.2)                                        | 40,608 (25.4)                                         |
| Left ventricular ejection fraction, %       |                                                 |                                                   |                                                   |                                                       |
| Mean (SD)                                   | 46.4 (16.9)                                     | 50.5 (15.0)                                       | 44.3 (17.1)                                       | 51.4 (14.2)                                           |
| Missing                                     | 4197 (7.2)                                      | 6719 (10.7)                                       | 892 (12.2)                                        | 40,608 (25.4)                                         |
| Symptoms                                    |                                                 |                                                   |                                                   |                                                       |
| Shortness of breath                         | 57,400 (98.9)                                   | 59,786 (95.3)                                     | 5680 (77.6)                                       | 102,277 (64.0)                                        |
| Orthopnea                                   | 28,285 (48.7)                                   | 16,488 (26.3)                                     | 2002 (27.4)                                       | 13,366 (8.4)                                          |
| Paroxysmal nocturnal dyspnea                | 13,675 (23.6)                                   | 7381 (11.8)                                       | 1021 (14.0)                                       | 6347 (4.0)                                            |
| Tachypnea                                   | 22,975 (39.6)                                   | 27,501 (43.8)                                     | 1706 (23.3)                                       | 28,918 (18.1)                                         |
| Weight Gain                                 | 14,498 (25.0)                                   | 6161 (9.8)                                        | 708 (9.7)                                         | 4164 (2.6)                                            |
| Fatigue                                     | 14,157 (24.4)                                   | 16,178 (25.8)                                     | 1588 (21.7)                                       | 30,570 (19.1)                                         |
| Signs                                       |                                                 |                                                   |                                                   |                                                       |
| Hypoxia (SpO <sub>2</sub> <94%)             | 29,827 (51.4)                                   | 40,849 (65.1)                                     | 2634 (36.0)                                       | 64,309 (40.2)                                         |
| Rales                                       | 51,037 (87.9)                                   | 51,036 (81.3)                                     | 4313 (59.0)                                       | 64,582 (40.4)                                         |
| S3 gallop                                   | 1857 (3.2)                                      | 1040 (1.7)                                        | 175 (2.4)                                         | 861 (0.5)                                             |
| Lower extremity edema                       | 52,335 (90.2)                                   | 50,730 (80.8)                                     | 4702 (64.3)                                       | 81,536 (51.0)                                         |

| Characteristics, n (%)                       | WHF with Primary Discharge Diagnosis (N=58,042) | WHF with Secondary Discharge Diagnosis (N=62,764) | No WHF with Primary Discharge Diagnosis (N=7,315) | No WHF with Secondary Discharge Diagnosis (N=159,871) |
|----------------------------------------------|-------------------------------------------------|---------------------------------------------------|---------------------------------------------------|-------------------------------------------------------|
| Jugular vein distension                      | 23,276 (40.1)                                   | 15,862 (25.3)                                     | 1842 (25.2)                                       | 11,450 (7.2)                                          |
| Hepatomegaly                                 | 660 (1.1)                                       | 655 (1.0)                                         | 73 (1.0)                                          | 1019 (0.6)                                            |
| Abdominal swelling                           | 10,718 (18.5)                                   | 10,232 (16.3)                                     | 616 (8.4)                                         | 18,161 (11.4)                                         |
| <b>Objective Findings</b>                    |                                                 |                                                   |                                                   |                                                       |
| Tachycardia (HR > 100 bpm)                   | 27,833 (48.0)                                   | 39,037 (62.2)                                     | 3089 (42.2)                                       | 75,551 (47.3)                                         |
| B-type natriuretic peptide ≥100 ng/L         | 54,846 (94.5)                                   | 50,396 (80.3)                                     | 5471 (74.8)                                       | 60,827 (38.0)                                         |
| Pulmonary edema on Chest X-ray               | 39,390 (67.9)                                   | 43,850 (69.9)                                     | 3845 (52.6)                                       | 60,263 (37.7)                                         |
| Cardiomegaly on Chest X-ray                  | 38,994 (67.2)                                   | 37,584 (59.9)                                     | 3841 (52.5)                                       | 53,554 (33.5)                                         |
| Pleural effusion on Chest X-ray              | 47,787 (82.3)                                   | 51,230 (81.6)                                     | 4953 (67.7)                                       | 90,801 (56.8)                                         |
| <b>Therapies</b>                             |                                                 |                                                   |                                                   |                                                       |
| ≥2 administrations of IV diuretic            | 57,945 (99.8)                                   | 61,888 (98.6)                                     | 1136 (15.5)                                       | 5838 (3.7)                                            |
| Dialysis or CRRT                             | 378 (0.7)                                       | 1647 (2.6)                                        | 21 (0.3)                                          | 293 (0.2)                                             |
| ≥1 Symptom                                   | 58,042 (100.0)                                  | 62,764 (100.0)                                    | 5854 (80.0)                                       | 117,510 (73.5)                                        |
| ≥1 Sign                                      | 58,042 (100.0)                                  | 62,764 (100.0)                                    | 6064 (82.9)                                       | 126,446 (79.1)                                        |
| ≥1 Objective                                 | 57,798 (99.6)                                   | 62,057 (98.9)                                     | 6549 (89.5)                                       | 130,922 (81.9)                                        |
| ≥1 Therapy                                   | 58,042 (100.0)                                  | 62,764 (100.0)                                    | 1149 (15.7)                                       | 6085 (3.8)                                            |
| <b>Tobacco use</b>                           |                                                 |                                                   |                                                   |                                                       |
| Current Smoker                               | 4652 (8.0)                                      | 5267 (8.4)                                        | 641 (8.8)                                         | 11,322 (7.1)                                          |
| Former Smoker                                | 29,620 (51.0)                                   | 32,662 (52.0)                                     | 3601 (49.2)                                       | 82,507 (51.6)                                         |
| Never Smoker                                 | 23,770 (41.0)                                   | 24,835 (39.6)                                     | 3073 (42.0)                                       | 66,042 (41.3)                                         |
| <b>Medical history</b>                       |                                                 |                                                   |                                                   |                                                       |
| Atrial fibrillation or flutter               | 31,047 (53.5)                                   | 30,578 (48.7)                                     | 3616 (49.4)                                       | 77,922 (48.7)                                         |
| Ventricular fibrillation or tachycardia      | 3571 (6.2)                                      | 3047 (4.9)                                        | 589 (8.1)                                         | 9256 (5.8)                                            |
| Ischemic stroke or transient ischemic attack | 5363 (9.2)                                      | 5580 (8.9)                                        | 674 (9.2)                                         | 21,038 (13.2)                                         |
| Acute myocardial infarction                  | 6312 (10.9)                                     | 9742 (15.5)                                       | 901 (12.3)                                        | 20,088 (12.6)                                         |
| Prior documented heart failure               | 46,959 (80.9)                                   | 37,884 (60.4)                                     | 5966 (81.6)                                       | 109,648 (68.6)                                        |
| Mitral or aortic valvular disease            | 17,264 (29.7)                                   | 16,651 (26.5)                                     | 2189 (29.9)                                       | 37,155 (23.2)                                         |
| Venous thromboembolism                       | 7040 (12.1)                                     | 8240 (13.1)                                       | 916 (12.5)                                        | 21,750 (13.6)                                         |
| Hospitalized bleed                           | 5109 (8.8)                                      | 6161 (9.8)                                        | 586 (8.0)                                         | 20,518 (12.8)                                         |
| Diabetes mellitus                            | 30,035 (51.7)                                   | 30,742 (49.0)                                     | 3340 (45.7)                                       | 74,747 (46.8)                                         |
| Hypertension                                 | 49,030 (84.5)                                   | 50,854 (81.0)                                     | 5894 (80.6)                                       | 132,042 (82.6)                                        |
| Dyslipidemia                                 | 50,263 (86.6)                                   | 52,234 (83.2)                                     | 6151 (84.1)                                       | 136,542 (85.4)                                        |
| Hyperthyroidism                              | 3211 (5.5)                                      | 3516 (5.6)                                        | 454 (6.2)                                         | 10,605 (6.6)                                          |
| Hypothyroidism                               | 14,052 (24.2)                                   | 14,718 (23.4)                                     | 1752 (24.0)                                       | 39,479 (24.7)                                         |
| Chronic kidney disease                       | 37,210 (64.1)                                   | 34,247 (54.6)                                     | 4364 (59.7)                                       | 84,133 (52.6)                                         |
| Chronic liver disease                        | 4525 (7.8)                                      | 4888 (7.8)                                        | 546 (7.5)                                         | 13,100 (8.2)                                          |

| Characteristics, n (%)                                          | WHF with Primary Discharge Diagnosis (N=58,042) | WHF with Secondary Discharge Diagnosis (N=62,764) | No WHF with Primary Discharge Diagnosis (N=7,315) | No WHF with Secondary Discharge Diagnosis (N=159,871) |
|-----------------------------------------------------------------|-------------------------------------------------|---------------------------------------------------|---------------------------------------------------|-------------------------------------------------------|
| Chronic lung disease                                            | 30,613 (52.7)                                   | 34,036 (54.2)                                     | 3508 (48.0)                                       | 83,023 (51.9)                                         |
| Diagnosed depression                                            | 11,870 (20.5)                                   | 12,966 (20.7)                                     | 1553 (21.2)                                       | 38,930 (24.4)                                         |
| Diagnosed dementia                                              | 5216 (9.0)                                      | 5530 (8.8)                                        | 764 (10.4)                                        | 20,782 (13.0)                                         |
| <b>Vital signs (pre-admission)</b>                              |                                                 |                                                   |                                                   |                                                       |
| Body mass index, kg/m <sup>2</sup>                              |                                                 |                                                   |                                                   |                                                       |
| Mean (SD)                                                       | 29.6 (8.8)                                      | 29.6 (8.7)                                        | 28.0 (7.7)                                        | 28.4 (8.0)                                            |
| Missing                                                         | 4865 (8.4)                                      | 6152 (9.8)                                        | 814 (11.1)                                        | 14,233 (8.9)                                          |
| Systolic blood pressure, mmHg                                   |                                                 |                                                   |                                                   |                                                       |
| Mean (SD)                                                       | 123.3 (22.7)                                    | 124.7 (21.9)                                      | 122.0 (23.1)                                      | 125.3 (21.2)                                          |
| Missing                                                         | 4051 (7.0)                                      | 4982 (7.9)                                        | 686 (9.4)                                         | 10,995 (6.9)                                          |
| <b>Laboratory values</b>                                        |                                                 |                                                   |                                                   |                                                       |
| Hemoglobin, g/dL                                                |                                                 |                                                   |                                                   |                                                       |
| Mean (SD)                                                       | 11.5 (2.1)                                      | 11.6 (2.2)                                        | 11.8 (2.0)                                        | 11.9 (2.0)                                            |
| Missing,                                                        | 8372 (14.4)                                     | 10,492 (16.7)                                     | 1266 (17.3)                                       | 23,272 (14.6)                                         |
| Hemoglobin A1C, %                                               |                                                 |                                                   |                                                   |                                                       |
| Mean (SD)                                                       | 6.8 (1.5)                                       | 6.7 (1.4)                                         | 6.7 (1.5)                                         | 6.7 (1.5)                                             |
| Missing                                                         | 18,969 (32.7)                                   | 22,082 (35.2)                                     | 2771 (37.9)                                       | 57,165 (35.8)                                         |
| Serum creatinine, mg/dL                                         |                                                 |                                                   |                                                   |                                                       |
| Mean (SD)                                                       | 1.7 (1.1)                                       | 1.5 (1.1)                                         | 1.5 (1.0)                                         | 1.3 (0.8)                                             |
| Missing                                                         | 5676 (9.8)                                      | 7477 (11.9)                                       | 892 (12.2)                                        | 15,556 (9.7)                                          |
| Estimated glomerular filtration rate, mL/min/1.73m <sup>2</sup> |                                                 |                                                   |                                                   |                                                       |
| Mean (SD)                                                       | 47.4 (23.9)                                     | 52.8 (25.0)                                       | 50.4 (23.8)                                       | 56.2 (24.1)                                           |
| Missing                                                         | 5676 (9.8)                                      | 7477 (11.9)                                       | 892 (12.2)                                        | 15,556 (9.7)                                          |
| B-type natriuretic peptide, pg/mL                               |                                                 |                                                   |                                                   |                                                       |
| Mean (SD)                                                       | 1075.1 (967.0)                                  | 865.4 (868.4)                                     | 1025.6 (975.9)                                    | 641.7 (748.0)                                         |
| Missing                                                         | 2518 (4.3)                                      | 3300 (5.3)                                        | 469 (6.4)                                         | 20,025 (12.5)                                         |
| <b>Medications</b>                                              |                                                 |                                                   |                                                   |                                                       |
| Angiotensin-converting enzyme inhibitor                         | 28,463 (49.0)                                   | 27,889 (44.4)                                     | 3656 (50.0)                                       | 75,552 (47.3)                                         |
| Angiotensin II receptor blocker                                 | 16,456 (28.4)                                   | 15,872 (25.3)                                     | 1988 (27.2)                                       | 41,485 (25.9)                                         |
| Angiotensin receptor-neprilysin inhibitor                       | 393 (0.7)                                       | 210 (0.3)                                         | 68 (0.9)                                          | 506 (0.3)                                             |
| Aldosterone receptor antagonist                                 | 10,792 (18.6)                                   | 8012 (12.8)                                       | 1495 (20.4)                                       | 20,744 (13.0)                                         |
| Diuretic                                                        | 49,056 (84.5)                                   | 48,202 (76.8)                                     | 5825 (79.6)                                       | 119,080 (74.5)                                        |
| Beta-blocker                                                    | 45,991 (79.2)                                   | 45,418 (72.4)                                     | 5644 (77.2)                                       | 120,198 (75.2)                                        |
| Calcium channel blocker                                         | 25,173 (43.4)                                   | 26,285 (41.9)                                     | 2809 (38.4)                                       | 61,928 (38.7)                                         |
| Antiarrhythmic drug                                             | 9328 (16.1)                                     | 8712 (13.9)                                       | 1299 (17.8)                                       | 22,446 (14.0)                                         |
| Oral anticoagulant                                              | 24,778 (42.7)                                   | 23,892 (38.1)                                     | 2926 (40.0)                                       | 62,890 (39.3)                                         |
| Antiplatelet drug                                               | 10,453 (18.0)                                   | 10,881 (17.3)                                     | 1310 (17.9)                                       | 30,515 (19.1)                                         |
| Any anti-hypertensive drugs                                     | 51,743 (89.1)                                   | 53,690 (85.5)                                     | 6377 (87.2)                                       | 140,684 (88.0)                                        |

| Characteristics, n (%)                    | WHF with Primary Discharge Diagnosis (N=58,042) | WHF with Secondary Discharge Diagnosis (N=62,764) | No WHF with Primary Discharge Diagnosis (N=7,315) | No WHF with Secondary Discharge Diagnosis (N=159,871) |
|-------------------------------------------|-------------------------------------------------|---------------------------------------------------|---------------------------------------------------|-------------------------------------------------------|
| Statins                                   | 43,674 (75.2)                                   | 44,113 (70.3)                                     | 5231 (71.5)                                       | 115,323 (72.1)                                        |
| Other lipid-lowering drugs                | 3360 (5.8)                                      | 3368 (5.4)                                        | 455 (6.2)                                         | 10,089 (6.3)                                          |
| Nitrates                                  | 23,047 (39.7)                                   | 19,368 (30.9)                                     | 2828 (38.7)                                       | 48,012 (30.0)                                         |
| Vasodilators                              | 27,396 (47.2)                                   | 23,616 (37.6)                                     | 3300 (45.1)                                       | 58,463 (36.6)                                         |
| Any diabetic therapy                      | 23,336 (40.2)                                   | 23,868 (38.0)                                     | 2593 (35.4)                                       | 56,765 (35.5)                                         |
| Sodium-glucose cotransporter-2 inhibitors | 59 (0.1)                                        | 39 (0.1)                                          | 7 (0.1)                                           | 115 (0.1)                                             |

**Abbreviations:** N = number; SD = standard deviation; HR = heart rate; IV = intravenous; CRRT = continuous renal

replacement therapy

**eTable 5.** List of Top 300 Principal Diagnoses for Hospitalizations for Worsening Heart Failure With a Secondary Discharge Diagnosis Code for Heart Failure

| Code   | Code Type | Description                                                                            | N    | Percent |
|--------|-----------|----------------------------------------------------------------------------------------|------|---------|
| A41.9  | ICD10     | Sepsis, Unspecified Organism                                                           | 6546 | 10.43   |
| 38.9   | ICD9      | Unspecified Septicemia                                                                 | 5878 | 9.37    |
| 410.71 | ICD9      | Subendocardial Infarction, Initial Episode of Care                                     | 2968 | 4.73    |
| I21.4  | ICD10     | Non-ST Elevation Myocardial Infarction (NSTEMI)                                        | 2487 | 3.96    |
| 518.84 | ICD9      | Acute and Chronic Respiratory Failure                                                  | 1846 | 2.94    |
| J96.01 | ICD10     | Acute Respiratory Failure with Hypoxia                                                 | 1744 | 2.78    |
| 518.81 | ICD9      | Acute Respiratory Failure                                                              | 1647 | 2.62    |
| 427.31 | ICD9      | Atrial Fibrillation                                                                    | 1592 | 2.54    |
| J96.21 | ICD10     | Acute and Chronic Respiratory Failure with Hypoxia                                     | 1444 | 2.3     |
| 486    | ICD9      | Pneumonia, Organism Unspecified                                                        | 1380 | 2.2     |
| I48.91 | ICD10     | Unspecified Atrial Fibrillation                                                        | 881  | 1.4     |
| J18.9  | ICD10     | Pneumonia, Unspecified Organism                                                        | 837  | 1.33    |
| 584.9  | ICD9      | Acute Kidney Failure, Unspecified                                                      | 805  | 1.28    |
| J44.1  | ICD10     | Chronic Obstructive Pulmonary Disease with (Acute) Exacerbation                        | 745  | 1.19    |
| N17.9  | ICD10     | Acute Kidney Failure, Unspecified                                                      | 721  | 1.15    |
| 491.21 | ICD9      | Obstructive Chronic Bronchitis with (Acute) Exacerbation                               | 687  | 1.09    |
| 424.1  | ICD9      | Aortic Valve Disorders                                                                 | 628  | 1       |
| J96.22 | ICD10     | Acute and Chronic Respiratory Failure with Hypercapnia                                 | 530  | 0.84    |
| 493.22 | ICD9      | Chronic Obstructive Asthma with (Acute) Exacerbation                                   | 447  | 0.71    |
| J96.00 | ICD10     | Acute Respiratory Failure, Unspecified Whether with Hypoxia or Hypercapnia             | 443  | 0.71    |
| 414.01 | ICD9      | Coronary Atherosclerosis of Native Coronary Artery                                     | 432  | 0.69    |
| I35.0  | ICD10     | Non-rheumatic Aortic (Valve) Stenosis                                                  | 426  | 0.68    |
| I48.0  | ICD10     | Paroxysmal Atrial Fibrillation                                                         | 402  | 0.64    |
| 682.6  | ICD9      | Cellulitis and Abscess of Leg, Except Foot                                             | 344  | 0.55    |
| 38.42  | ICD9      | Septicemia Due to Escherichia Coli [E. Coli]                                           | 328  | 0.52    |
| 507    | ICD9      | Pneumonitis Due to Inhalation of Food or Vomitus                                       | 322  | 0.51    |
| 424    | ICD9      | Mitral Valve Disorders                                                                 | 319  | 0.51    |
| A41.51 | ICD10     | Sepsis Due to Escherichia Coli [E. Coli]                                               | 307  | 0.49    |
| 415.19 | ICD9      | Other Pulmonary Embolism and Infarction                                                | 296  | 0.47    |
| I25.10 | ICD10     | Atherosclerotic Heart Disease of Native Coronary Artery without Angina Pectoris        | 284  | 0.45    |
| J96.20 | ICD10     | Acute and Chronic Respiratory Failure, Unspecified Whether with Hypoxia or Hypercapnia | 262  | 0.42    |
| I34.0  | ICD10     | Non-rheumatic Mitral (Valve) Insufficiency                                             | 245  | 0.39    |
| 578.9  | ICD9      | Hemorrhage of Gastrointestinal Tract, Unspecified                                      | 242  | 0.39    |
| 434.91 | ICD9      | Cerebral Artery Occlusion, Unspecified with Cerebral Infarction                        | 241  | 0.38    |
| J69.0  | ICD10     | Pneumonitis Due to Inhalation of Food and Vomit                                        | 232  | 0.37    |
| I26.99 | ICD10     | Other Pulmonary Embolism without Acute Cor Pulmonale                                   | 216  | 0.34    |
| 38     | ICD9      | Streptococcal Septicemia                                                               | 211  | 0.34    |
| J96.02 | ICD10     | Acute Respiratory Failure with Hypercapnia                                             | 199  | 0.32    |
| 410.11 | ICD9      | Acute Myocardial Infarction of Other Anterior Wall, Initial Episode of Care            | 193  | 0.31    |

| Code    | Code Type | Description                                                                                           | N   | Percent |
|---------|-----------|-------------------------------------------------------------------------------------------------------|-----|---------|
| A41.89  | ICD10     | Other Specified Sepsis                                                                                | 193 | 0.31    |
| I48.92  | ICD10     | Unspecified Atrial Flutter                                                                            | 187 | 0.3     |
| K92.2   | ICD10     | Gastrointestinal Hemorrhage, Unspecified                                                              | 185 | 0.29    |
| 38.49   | ICD9      | Other Septicemia Due to Gram-Negative Organisms                                                       | 171 | 0.27    |
| 427.32  | ICD9      | Atrial Flutter                                                                                        | 171 | 0.27    |
| I47.2   | ICD10     | Ventricular Tachycardia                                                                               | 159 | 0.25    |
| 250.4   | ICD9      | Diabetes with Renal Manifestations, Type II or Unspecified Type, Not Stated as Uncontrolled           | 158 | 0.25    |
| I48.2   | ICD10     | Chronic Atrial Fibrillation                                                                           | 158 | 0.25    |
| 426     | ICD9      | Atrioventricular Block, Complete                                                                      | 154 | 0.25    |
| L03.116 | ICD10     | Cellulitis of Left Lower Limb                                                                         | 153 | 0.24    |
| 427.1   | ICD9      | Paroxysmal Ventricular Tachycardia                                                                    | 148 | 0.24    |
| I44.2   | ICD10     | Atrioventricular Block, Complete                                                                      | 146 | 0.23    |
| I63.9   | ICD10     | Cerebral Infarction, Unspecified                                                                      | 143 | 0.23    |
| E87.1   | ICD10     | Hypo-Osmolality and Hyponatremia                                                                      | 141 | 0.22    |
| 599     | ICD9      | Urinary Tract Infection, Site Not Specified                                                           | 139 | 0.22    |
| I16.1   | ICD10     | Hypertensive Emergency                                                                                | 137 | 0.22    |
| 250.8   | ICD9      | Diabetes with Other Specified Manifestations, Type II or Unspecified Type, Not Stated as Uncontrolled | 135 | 0.22    |
| 511.9   | ICD9      | Unspecified Pleural Effusion                                                                          | 135 | 0.22    |
| 427.89  | ICD9      | Other Specified Cardiac Dysrhythmias                                                                  | 133 | 0.21    |
| I21.09  | ICD10     | ST Elevation Myocardial Infarction (STEMI) Involving Other Coronary Artery of Anterior Wall           | 133 | 0.21    |
| 416.8   | ICD9      | Other Chronic Pulmonary Heart Diseases                                                                | 130 | 0.21    |
| 820.21  | ICD9      | Closed Fracture of Intertrochanteric Section of Neck Of Femur                                         | 130 | 0.21    |
| J90     | ICD10     | Pleural Effusion, Not Elsewhere Classified                                                            | 130 | 0.21    |
| 434.11  | ICD9      | Cerebral Embolism with Cerebral Infarction                                                            | 126 | 0.2     |
| L03.115 | ICD10     | Cellulitis of Right Lower Limb                                                                        | 126 | 0.2     |
| E11.22  | ICD10     | Type 2 Diabetes Mellitus with Diabetic Chronic Kidney Disease                                         | 124 | 0.2     |
| 996.64  | ICD9      | Infection and Inflammatory Reaction Due to Indwelling Urinary Catheter                                | 118 | 0.19    |
| 410.91  | ICD9      | Acute Myocardial Infarction of Unspecified Site, Initial Episode of Care                              | 117 | 0.19    |
| 584.5   | ICD9      | Acute Kidney Failure with Lesion of Tubular Necrosis                                                  | 117 | 0.19    |
| 38.11   | ICD9      | Methicillin Susceptible Staphylococcus Aureus Septicemia                                              | 116 | 0.18    |
| 280.9   | ICD9      | Iron Deficiency Anemia, Unspecified                                                                   | 105 | 0.17    |
| A41.01  | ICD10     | Sepsis Due to Methicillin Susceptible Staphylococcus Aureus                                           | 105 | 0.17    |
| A41.59  | ICD10     | Other Gram-Negative Sepsis                                                                            | 105 | 0.17    |
| I25.110 | ICD10     | Atherosclerotic Heart Disease of Native Coronary Artery with Unstable Angina Pectoris                 | 104 | 0.17    |
| 276.1   | ICD9      | Hyposmolality and/or Hyponatremia                                                                     | 103 | 0.16    |
| 820.8   | ICD9      | Closed Fracture of Unspecified Part of Neck of Femur                                                  | 102 | 0.16    |
| 410.41  | ICD9      | Acute Myocardial Infarction of Other Inferior Wall, Initial Episode Of Care                           | 101 | 0.16    |
| N39.0   | ICD10     | Urinary Tract Infection, Site Not Specified                                                           | 101 | 0.16    |
| J44.0   | ICD10     | Chronic Obstructive Pulmonary Disease with (Acute) Lower Respiratory Infection                        | 99  | 0.16    |
| N17.0   | ICD10     | Acute Kidney Failure with Tubular Necrosis                                                            | 98  | 0.16    |
| 427.81  | ICD9      | Sinoatrial Node Dysfunction                                                                           | 97  | 0.15    |

| Code      | Code Type | Description                                                                                 | N  | Percent |
|-----------|-----------|---------------------------------------------------------------------------------------------|----|---------|
| I16.0     | ICD10     | Hypertensive Urgency                                                                        | 95 | 0.15    |
| I49.5     | ICD10     | Sick Sinus Syndrome                                                                         | 95 | 0.15    |
| 414       | ICD9      | Coronary Atherosclerosis of Unspecified Type of Vessel, Native or Graft                     | 92 | 0.15    |
| 786.59    | ICD9      | Other Chest Pain                                                                            | 92 | 0.15    |
| R00.1     | ICD10     | Bradycardia, Unspecified                                                                    | 92 | 0.15    |
| 578.1     | ICD9      | Blood in Stool                                                                              | 91 | 0.14    |
| 396.2     | ICD9      | Mitral Valve Insufficiency and Aortic Valve Stenosis                                        | 88 | 0.14    |
| I21.3     | ICD10     | ST Elevation Myocardial Infarction Of Unspecified Site                                      | 88 | 0.14    |
| D50.9     | ICD10     | Iron Deficiency Anemia, Unspecified                                                         | 87 | 0.14    |
| I21.19    | ICD10     | ST Elevation Myocardial Infarction (STEMI) Involving Other Coronary Artery of Inferior Wall | 86 | 0.14    |
| E11.649   | ICD10     | Type 2 Diabetes Mellitus with Hypoglycemia without Coma                                     | 84 | 0.13    |
| 38.12     | ICD9      | Methicillin Resistant Staphylococcus Aureus Septicemia                                      | 82 | 0.13    |
| 491.22    | ICD9      | Obstructive Chronic Bronchitis with Acute Bronchitis                                        | 82 | 0.13    |
| I35.2     | ICD10     | Non-rheumatic Aortic (Valve) Stenosis with Insufficiency                                    | 82 | 0.13    |
| J81.0     | ICD10     | Acute Pulmonary Edema                                                                       | 82 | 0.13    |
| I48.1     | ICD10     | Persistent Atrial Fibrillation                                                              | 80 | 0.13    |
| 280       | ICD9      | Iron Deficiency Anemia Secondary to Blood Loss (Chronic)                                    | 77 | 0.12    |
| 515       | ICD9      | Post-inflammatory Pulmonary Fibrosis                                                        | 77 | 0.12    |
| I31.3     | ICD10     | Pericardial Effusion (Non-inflammatory)                                                     | 77 | 0.12    |
| 562.12    | ICD9      | Diverticulosis Of Colon with Hemorrhage                                                     | 76 | 0.12    |
| A40.8     | ICD10     | Other Streptococcal Sepsis                                                                  | 75 | 0.12    |
| I08.0     | ICD10     | Rheumatic Disorders of Both Mitral and Aortic Valves                                        | 75 | 0.12    |
| T83.511 A | ICD10     | Infection And Inflammatory Reaction Due to Indwelling Urethral Catheter, Initial Encounter  | 74 | 0.12    |
| 577       | ICD9      | Acute Pancreatitis                                                                          | 73 | 0.12    |
| I42.0     | ICD10     | Dilated Cardiomyopathy                                                                      | 73 | 0.12    |
| I24.8     | ICD10     | Other Forms of Acute Ischemic Heart Disease                                                 | 72 | 0.11    |
| 8.45      | ICD9      | Intestinal Infection Due to Clostridium Difficile                                           | 71 | 0.11    |
| 518.83    | ICD9      | Chronic Respiratory Failure                                                                 | 71 | 0.11    |
| T43.621 A | ICD10     | Poisoning by Amphetamines, Accidental (Unintentional), Initial Encounter                    | 71 | 0.11    |
| 531.4     | ICD9      | Chronic or Unspecified Gastric Ulcer with Hemorrhage, without Mention of Obstruction        | 70 | 0.11    |
| R57.0     | ICD10     | Cardiogenic Shock                                                                           | 70 | 0.11    |
| A41.02    | ICD10     | Sepsis Due to Methicillin Resistant Staphylococcus Aureus                                   | 69 | 0.11    |
| 38.8      | ICD9      | Other Specified Septicemias                                                                 | 68 | 0.11    |
| 998.59    | ICD9      | Other Postoperative Infection                                                               | 68 | 0.11    |
| 780.2     | ICD9      | Syncope and Collapse                                                                        | 67 | 0.11    |
| A41.81    | ICD10     | Sepsis Due to Enterococcus                                                                  | 67 | 0.11    |
| 532.4     | ICD9      | Chronic or Unspecified Duodenal Ulcer with Hemorrhage, without Mention of Obstruction       | 66 | 0.11    |
| 427.41    | ICD9      | Ventricular Fibrillation                                                                    | 65 | 0.1     |
| A41.50    | ICD10     | Gram-Negative Sepsis, Unspecified                                                           | 64 | 0.1     |
| I21.A1    | ICD10     | Myocardial Infarction Type 2                                                                | 64 | 0.1     |
| I08.3     | ICD10     | Combined Rheumatic Disorders of Mitral, Aortic and Tricuspid Valves                         | 63 | 0.1     |

| Code    | Code Type | Description                                                                                                                    | N  | Percent |
|---------|-----------|--------------------------------------------------------------------------------------------------------------------------------|----|---------|
| I25.118 | ICD10     | Atherosclerotic Heart Disease of Native Coronary Artery with Other Forms of Angina Pectoris                                    | 63 | 0.1     |
| J45.901 | ICD10     | Unspecified Asthma with (Acute) Exacerbation                                                                                   | 62 | 0.1     |
| 285.9   | ICD9      | Anemia, Unspecified                                                                                                            | 60 | 0.1     |
| 560.9   | ICD9      | Unspecified Intestinal Obstruction                                                                                             | 59 | 0.09    |
| 403.9   | ICD9      | Hypertensive Chronic Kidney Disease, Unspecified, with Chronic Kidney Disease Stage I Through Stage IIV, or Unspecified        | 58 | 0.09    |
| 421     | ICD9      | Acute and Subacute Bacterial Endocarditis                                                                                      | 58 | 0.09    |
| K92.1   | ICD10     | Melena                                                                                                                         | 58 | 0.09    |
| 276.7   | ICD9      | Hyperpotassemia                                                                                                                | 56 | 0.09    |
| 493.92  | ICD9      | Asthma, Unspecified Type, with (Acute) Exacerbation                                                                            | 56 | 0.09    |
| R55     | ICD10     | Syncope and Collapse                                                                                                           | 56 | 0.09    |
| I35.1   | ICD10     | Non-rheumatic Aortic (Valve) Insufficiency                                                                                     | 55 | 0.09    |
| I51.81  | ICD10     | Takotsubo Syndrome                                                                                                             | 53 | 0.08    |
| A40.1   | ICD10     | Sepsis Due to Streptococcus, Group B                                                                                           | 52 | 0.08    |
| I21.02  | ICD10     | ST Elevation Myocardial Infarction (STEMI) Involving Left Anterior Descending Coronary Artery                                  | 52 | 0.08    |
| I46.9   | ICD10     | Cardiac Arrest, Cause Unspecified                                                                                              | 52 | 0.08    |
| I47.1   | ICD10     | Supraventricular Tachycardia                                                                                                   | 52 | 0.08    |
| I33.0   | ICD10     | Acute and Subacute Infective Endocarditis                                                                                      | 51 | 0.08    |
| 410.01  | ICD9      | Acute Myocardial Infarction of Anterolateral Wall, Initial Episode of Care                                                     | 50 | 0.08    |
| R07.89  | ICD10     | Other Chest Pain                                                                                                               | 50 | 0.08    |
| 431     | ICD9      | Intracerebral Hemorrhage                                                                                                       | 49 | 0.08    |
| 820.09  | ICD9      | Other Closed Transcervical Fracture of Neck of Femur                                                                           | 49 | 0.08    |
| 997.1   | ICD9      | Cardiac Complications, Not Elsewhere Classified                                                                                | 49 | 0.08    |
| I12.9   | ICD10     | Hypertensive Chronic Kidney Disease with Stage 1 Through Stage 4 Chronic Kidney Disease, or Unspecified Chronic Kidney Disease | 49 | 0.08    |
| I25.119 | ICD10     | Atherosclerotic Heart Disease of Native Coronary Artery with Unspecified Angina Pectoris                                       | 49 | 0.08    |
| 285.21  | ICD9      | Anemia in Chronic Kidney Disease                                                                                               | 48 | 0.08    |
| 276.69  | ICD9      | Other Fluid Overload                                                                                                           | 47 | 0.07    |
| 403.91  | ICD9      | Hypertensive Chronic Kidney Disease, Unspecified, with Chronic Kidney Disease Stage V or End Stage Renal Disease               | 47 | 0.07    |
| 466     | ICD9      | Acute Bronchitis                                                                                                               | 47 | 0.07    |
| I08.1   | ICD10     | Rheumatic Disorders of Both Mitral And Tricuspid Valves                                                                        | 47 | 0.07    |
| K25.4   | ICD10     | Chronic or Unspecified Gastric Ulcer with Hemorrhage                                                                           | 47 | 0.07    |
| 537.83  | ICD9      | Angiodysplasia of Stomach And Duodenum with Hemorrhage                                                                         | 46 | 0.07    |
| I24.9   | ICD10     | Acute Ischemic Heart Disease, Unspecified                                                                                      | 46 | 0.07    |
| 38.2    | ICD9      | Pneumococcal Septicemia [Streptococcus Pneumoniae Septicemia]                                                                  | 45 | 0.07    |
| 38.43   | ICD9      | Septicemia Due to Pseudomonas                                                                                                  | 45 | 0.07    |
| 285.1   | ICD9      | Acute Post-hemorrhagic Anemia                                                                                                  | 45 | 0.07    |
| 427     | ICD9      | Paroxysmal Supraventricular Tachycardia                                                                                        | 45 | 0.07    |
| 429.83  | ICD9      | Takotsubo Syndrome                                                                                                             | 45 | 0.07    |
| 786.09  | ICD9      | Other Respiratory Abnormalities                                                                                                | 45 | 0.07    |
| 253.6   | ICD9      | Other Disorders of Neurohypophysis                                                                                             | 44 | 0.07    |
| 518.4   | ICD9      | Acute Edema of Lung, Unspecified                                                                                               | 44 | 0.07    |
| 572.2   | ICD9      | Hepatic Encephalopathy                                                                                                         | 44 | 0.07    |



| Code      | Code Type | Description                                                                                             | N  | Percent |
|-----------|-----------|---------------------------------------------------------------------------------------------------------|----|---------|
| D64.9     | ICD10     | Anemia, Unspecified                                                                                     | 44 | 0.07    |
| E87.5     | ICD10     | Hyperkalemia                                                                                            | 44 | 0.07    |
| J12.1     | ICD10     | Respiratory Syncytial Virus Pneumonia                                                                   | 44 | 0.07    |
| K31.811   | ICD10     | Angiodysplasia of Stomach and Duodenum with Bleeding                                                    | 44 | 0.07    |
| 396.3     | ICD9      | Mitral Valve Insufficiency and Aortic Valve Insufficiency                                               | 43 | 0.07    |
| 996.71    | ICD9      | Other Complications Due to Heart Valve Prosthesis                                                       | 43 | 0.07    |
| D50.0     | ICD10     | Iron Deficiency Anemia Secondary to Blood Loss (Chronic)                                                | 43 | 0.07    |
| I27.2     | ICD10     | Other Secondary Pulmonary Hypertension                                                                  | 43 | 0.07    |
| E87.70    | ICD10     | Fluid Overload, Unspecified                                                                             | 42 | 0.07    |
| J10.00    | ICD10     | Influenza Due to Other Identified Influenza Virus with Unspecified Type Of Pneumonia                    | 42 | 0.07    |
| T82.857 A | ICD10     | Stenosis of Other Cardiac Prosthetic Devices, Implants and Grafts, Initial Encounter                    | 42 | 0.07    |
| 423.9     | ICD9      | Unspecified Disease of Pericardium                                                                      | 41 | 0.07    |
| 782.3     | ICD9      | Edema                                                                                                   | 41 | 0.07    |
| K57.31    | ICD10     | Diverticulosis of Large Intestine without Perforation or Abscess with Bleeding                          | 41 | 0.07    |
| 250.7     | ICD9      | Diabetes with Peripheral Circulatory Disorders, Type II or Unspecified Type, Not Stated as Uncontrolled | 40 | 0.06    |
| 574       | ICD9      | Calculus of Gallbladder with Acute Cholecystitis, without Mention of Obstruction                        | 40 | 0.06    |
| 786.5     | ICD9      | Chest Pain, Unspecified                                                                                 | 39 | 0.06    |
| 996.83    | ICD9      | Complications of Transplanted Heart                                                                     | 39 | 0.06    |
| I44.1     | ICD10     | Atrioventricular Block, Second Degree                                                                   | 39 | 0.06    |
| 411.1     | ICD9      | Intermediate Coronary Syndrome                                                                          | 38 | 0.06    |
| R41.82    | ICD10     | Altered Mental Status, Unspecified                                                                      | 38 | 0.06    |
| S72.141 A | ICD10     | Displaced Intertrochanteric Fracture of Right Femur, Initial Encounter for Closed Fracture              | 38 | 0.06    |
| S72.142 A | ICD10     | Displaced Intertrochanteric Fracture Of Left Femur, Initial Encounter for Closed Fracture               | 38 | 0.06    |
| A41.52    | ICD10     | Sepsis Due to Pseudomonas                                                                               | 37 | 0.06    |
| K62.5     | ICD10     | Hemorrhage of Anus And Rectum                                                                           | 37 | 0.06    |
| R07.9     | ICD10     | Chest Pain, Unspecified                                                                                 | 37 | 0.06    |
| I25.5     | ICD10     | Ischemic Cardiomyopathy                                                                                 | 36 | 0.06    |
| I95.9     | ICD10     | Hypotension, Unspecified                                                                                | 36 | 0.06    |
| 396.8     | ICD9      | Multiple Involvement of Mitral and Aortic Valves                                                        | 35 | 0.06    |
| 780.97    | ICD9      | Altered Mental Status                                                                                   | 35 | 0.06    |
| 996.61    | ICD9      | Infection and Inflammatory Reaction Due to Cardiac Device, Implant, and Graft                           | 35 | 0.06    |
| 998.11    | ICD9      | Hemorrhage Complicating A Procedure                                                                     | 35 | 0.06    |
| D62       | ICD10     | Acute Post-hemorrhagic Anemia                                                                           | 35 | 0.06    |
| K26.4     | ICD10     | Chronic or Unspecified Duodenal Ulcer with Hemorrhage                                                   | 35 | 0.06    |
| S72.001 A | ICD10     | Fracture of Unspecified Part of Neck of Right Femur, Initial Encounter for Closed Fracture              | 35 | 0.06    |
| 969.72    | ICD9      | Poisoning by Amphetamines                                                                               | 34 | 0.05    |
| I49.01    | ICD10     | Ventricular Fibrillation                                                                                | 34 | 0.05    |
| 285.29    | ICD9      | Anemia of Other Chronic Disease                                                                         | 33 | 0.05    |
| 397       | ICD9      | Diseases of Tricuspid Valve                                                                             | 33 | 0.05    |

| Code         | Code Type | Description                                                                                                                                                     | N  | Percent |
|--------------|-----------|-----------------------------------------------------------------------------------------------------------------------------------------------------------------|----|---------|
| 480.1        | ICD9      | Pneumonia Due to Respiratory Syncytial Virus                                                                                                                    | 33 | 0.05    |
| J11.00       | ICD10     | Influenza Due to Unidentified Influenza Virus with Unspecified Type of Pneumonia                                                                                | 33 | 0.05    |
| 414.8        | ICD9      | Other Specified Forms of Chronic Ischemic Heart Disease                                                                                                         | 32 | 0.05    |
| 482.42       | ICD9      | Methicillin Resistant Pneumonia Due to Staphylococcus Aureus                                                                                                    | 32 | 0.05    |
| 514          | ICD9      | Pulmonary Congestion and Hypostasis                                                                                                                             | 31 | 0.05    |
| 562.11       | ICD9      | Diverticulitis of Colon (without Mention of Hemorrhage)                                                                                                         | 31 | 0.05    |
| 569.85       | ICD9      | Angiodysplasia of Intestine with Hemorrhage                                                                                                                     | 31 | 0.05    |
| 733.13       | ICD9      | Pathologic Fracture of Vertebrae                                                                                                                                | 31 | 0.05    |
| 780.09       | ICD9      | Other Alteration of Consciousness                                                                                                                               | 31 | 0.05    |
| J96.91       | ICD10     | Respiratory Failure, Unspecified with Hypoxia                                                                                                                   | 31 | 0.05    |
| T82.7X<br>XA | ICD10     | Infection and Inflammatory Reaction Due to Other Cardiac and Vascular Devices, Implants and Grafts, Initial Encounter                                           | 31 | 0.05    |
| 415          | ICD9      | Acute Cor Pulmonale                                                                                                                                             | 30 | 0.05    |
| 786.05       | ICD9      | Shortness of Breath                                                                                                                                             | 30 | 0.05    |
| A40.3        | ICD10     | Sepsis Due to Streptococcus Pneumoniae                                                                                                                          | 30 | 0.05    |
| J10.1        | ICD10     | Influenza Due to Other Identified Influenza Virus with Other Respiratory Manifestations                                                                         | 30 | 0.05    |
| S72.002<br>A | ICD10     | Fracture of Unspecified Part of Neck of Left Femur, Initial Encounter for Closed Fracture                                                                       | 30 | 0.05    |
| 38.19        | ICD9      | Other Staphylococcal Septicemia                                                                                                                                 | 29 | 0.05    |
| 38.3         | ICD9      | Septicemia Due to Anaerobes                                                                                                                                     | 29 | 0.05    |
| 410.72       | ICD9      | Subendocardial Infarction, Subsequent Episode of Care                                                                                                           | 29 | 0.05    |
| 487          | ICD9      | Influenza with Pneumonia                                                                                                                                        | 29 | 0.05    |
| 560.81       | ICD9      | Intestinal or Peritoneal Adhesions with Obstruction (Postoperative) (Post-infection)                                                                            | 29 | 0.05    |
| 852.21       | ICD9      | Subdural Hemorrhage Following Injury without Mention of Open Intracranial Wound, with No Loss of Consciousness                                                  | 29 | 0.05    |
| E22.2        | ICD10     | Syndrome of Inappropriate Secretion of Antidiuretic Hormone                                                                                                     | 29 | 0.05    |
| 275.42       | ICD9      | Hypercalcemia                                                                                                                                                   | 28 | 0.04    |
| A40.0        | ICD10     | Sepsis Due to Streptococcus, Group A                                                                                                                            | 28 | 0.04    |
| J11.1        | ICD10     | Influenza Due to Unidentified Influenza Virus with Other Respiratory Manifestations                                                                             | 28 | 0.04    |
| J15.9        | ICD10     | Unspecified Bacterial Pneumonia                                                                                                                                 | 28 | 0.04    |
| J84.9        | ICD10     | Interstitial Pulmonary Disease, Unspecified                                                                                                                     | 28 | 0.04    |
| K70.31       | ICD10     | Alcoholic Cirrhosis of Liver with Ascites                                                                                                                       | 28 | 0.04    |
| K72.90       | ICD10     | Hepatic Failure, Unspecified without Coma                                                                                                                       | 28 | 0.04    |
| 482.9        | ICD9      | Bacterial Pneumonia, Unspecified                                                                                                                                | 27 | 0.04    |
| I13.10       | ICD10     | Hypertensive Heart and Chronic Kidney Disease without Heart Failure, with Stage 1 Through Stage 4 Chronic Kidney Disease, or Unspecified Chronic Kidney Disease | 27 | 0.04    |
| I21.11       | ICD10     | ST Elevation Myocardial Infarction (STEMI) Involving Right Coronary Artery                                                                                      | 27 | 0.04    |
| I27.21       | ICD10     | Secondary Pulmonary Arterial Hypertension                                                                                                                       | 27 | 0.04    |
| I63.412      | ICD10     | Cerebral Infarction Due to Embolism of Left Middle Cerebral Artery                                                                                              | 27 | 0.04    |
| K80.00       | ICD10     | Calculus of Gallbladder with Acute Cholecystitis without Obstruction                                                                                            | 27 | 0.04    |
| S06.5X<br>0A | ICD10     | Traumatic Subdural Hemorrhage without Loss of Consciousness, Initial Encounter                                                                                  | 27 | 0.04    |
| 511.81       | ICD9      | Malignant Pleural Effusion                                                                                                                                      | 26 | 0.04    |

| Code      | Code Type | Description                                                                                        | N  | Percent |
|-----------|-----------|----------------------------------------------------------------------------------------------------|----|---------|
| R60.1     | ICD10     | Generalized Edema                                                                                  | 26 | 0.04    |
| 162.9     | ICD9      | Malignant Neoplasm of Bronchus and Lung, Unspecified                                               | 25 | 0.04    |
| 250.42    | ICD9      | Diabetes With Renal Manifestations, Type II or Unspecified Type, Uncontrolled                      | 25 | 0.04    |
| 396       | ICD9      | Mitral Valve Stenosis and Aortic Valve Stenosis                                                    | 25 | 0.04    |
| 425.4     | ICD9      | Other Primary Cardiomyopathies                                                                     | 25 | 0.04    |
| 427.5     | ICD9      | Cardiac Arrest                                                                                     | 25 | 0.04    |
| I63.511   | ICD10     | Cerebral Infarction Due to Unspecified Occlusion or Stenosis of Right Middle Cerebral Artery       | 25 | 0.04    |
| N04.9     | ICD10     | Nephrotic Syndrome with Unspecified Morphologic Changes                                            | 25 | 0.04    |
| R78.81    | ICD10     | Bacteremia                                                                                         | 25 | 0.04    |
| T81.4X XA | ICD10     | Infection Following a Procedure, Initial Encounter                                                 | 25 | 0.04    |
| T82.6X XA | ICD10     | Infection and Inflammatory Reaction Due to Cardiac Valve Prosthesis, Initial Encounter             | 25 | 0.04    |
| 276.51    | ICD9      | Dehydration                                                                                        | 24 | 0.04    |
| 410.51    | ICD9      | Acute Myocardial Infarction of Other Lateral Wall, Initial Episode Of Care                         | 24 | 0.04    |
| 423.2     | ICD9      | Constrictive Pericarditis                                                                          | 24 | 0.04    |
| 571.2     | ICD9      | Alcoholic Cirrhosis of Liver                                                                       | 24 | 0.04    |
| 996.02    | ICD9      | Mechanical Complication Due to Heart Valve Prosthesis                                              | 24 | 0.04    |
| 997.39    | ICD9      | Other Respiratory Complications                                                                    | 24 | 0.04    |
| A41.1     | ICD10     | Sepsis Due to Other Specified Staphylococcus                                                       | 24 | 0.04    |
| E66.2     | ICD10     | Morbid (Severe) Obesity with Alveolar Hypoventilation                                              | 24 | 0.04    |
| F10.239   | ICD10     | Alcohol Dependence with Withdrawal, Unspecified                                                    | 24 | 0.04    |
| 410.31    | ICD9      | Acute Myocardial Infarction of Inferoposterior Wall, Initial Episode of Care                       | 23 | 0.04    |
| 411.89    | ICD9      | Other Acute and Subacute Forms of Ischemic Heart Disease, Other                                    | 23 | 0.04    |
| 441.01    | ICD9      | Dissection of Aorta, Thoracic                                                                      | 23 | 0.04    |
| 557       | ICD9      | Acute Vascular Insufficiency of Intestine                                                          | 23 | 0.04    |
| 575       | ICD9      | Acute Cholecystitis                                                                                | 23 | 0.04    |
| 682.7     | ICD9      | Cellulitis and Abscess of Foot, Except Toes                                                        | 23 | 0.04    |
| 715.36    | ICD9      | Osteoarthritis, Localized, Not Specified Whether Primary or Secondary, Lower Leg                   | 23 | 0.04    |
| 790.7     | ICD9      | Bacteremia                                                                                         | 23 | 0.04    |
| 799.02    | ICD9      | Hypoxemia                                                                                          | 23 | 0.04    |
| I12.0     | ICD10     | Hypertensive Chronic Kidney Disease with Stage 5 Chronic Kidney Disease or End Stage Renal Disease | 23 | 0.04    |
| I27.29    | ICD10     | Other Secondary Pulmonary Hypertension                                                             | 23 | 0.04    |
| K29.71    | ICD10     | Gastritis, Unspecified, with Bleeding                                                              | 23 | 0.04    |
| 153.6     | ICD9      | Malignant Neoplasm of Ascending Colon                                                              | 22 | 0.04    |
| 410.7     | ICD9      | Subendocardial Infarction, Episode of Care Unspecified                                             | 22 | 0.04    |
| 453.41    | ICD9      | Acute Venous Embolism and Thrombosis of Deep Vessels of Proximal Lower Extremity                   | 22 | 0.04    |
| 535.51    | ICD9      | Unspecified Gastritis and Gastroduodenitis, with Hemorrhage                                        | 22 | 0.04    |
| 571.5     | ICD9      | Cirrhosis of Liver without Mention of Alcohol                                                      | 22 | 0.04    |
| I63.512   | ICD10     | Cerebral Infarction Due to Unspecified Occlusion or Stenosis of Left Middle Cerebral Artery        | 22 | 0.04    |
| J80       | ICD10     | Acute Respiratory Distress Syndrome                                                                | 22 | 0.04    |

| Code   | Code Type | Description                                                                                        | N  | Percent |
|--------|-----------|----------------------------------------------------------------------------------------------------|----|---------|
| Q23.1  | ICD10     | Congenital Insufficiency of Aortic Valve                                                           | 22 | 0.04    |
| R06.02 | ICD10     | Shortness of Breath                                                                                | 22 | 0.04    |
| 205    | ICD9      | Acute Myeloid Leukemia, without Mention of Having Achieved Remission                               | 21 | 0.03    |
| 250.6  | ICD9      | Diabetes with Neurological Manifestations, Type II or Unspecified Type, Not Stated as Uncontrolled | 21 | 0.03    |
| 401.9  | ICD9      | Unspecified Essential Hypertension                                                                 | 21 | 0.03    |
| 432.1  | ICD9      | Subdural Hemorrhage                                                                                | 21 | 0.03    |
| 435.9  | ICD9      | Unspecified Transient Cerebral Ischemia                                                            | 21 | 0.03    |
| 441.4  | ICD9      | Abdominal Aneurysm without Mention of Rupture                                                      | 21 | 0.03    |
| 458.9  | ICD9      | Hypotension, Unspecified                                                                           | 21 | 0.03    |
| 459.81 | ICD9      | Venous (Peripheral) Insufficiency, Unspecified                                                     | 21 | 0.03    |
| 496    | ICD9      | Chronic Airway Obstruction, Not Elsewhere Classified                                               | 21 | 0.03    |
| 511.89 | ICD9      | Other Specified Forms of Effusion, Except Tuberculous                                              | 21 | 0.03    |
| 729.92 | ICD9      | Non-traumatic Hematoma of Soft Tissue                                                              | 21 | 0.03    |
| E11.52 | ICD10     | Type 2 Diabetes Mellitus With Diabetic Peripheral Angiopathy with Gangrene                         | 21 | 0.03    |
| I27.20 | ICD10     | Pulmonary Hypertension, Unspecified                                                                | 21 | 0.03    |
| I63.40 | ICD10     | Cerebral Infarction Due to Embolism of Unspecified Cerebral Artery                                 | 21 | 0.03    |
| I71.01 | ICD10     | Dissection of Thoracic Aorta                                                                       | 21 | 0.03    |
| K81.0  | ICD10     | Acute Cholecystitis                                                                                | 21 | 0.03    |
| O90.3  | ICD10     | Peripartum Cardiomyopathy                                                                          | 21 | 0.03    |
| T86.21 | ICD10     | Heart Transplant Rejection                                                                         | 21 | 0.03    |
| 38.4   | ICD9      | Septicemia Due to Gram-Negative Organism, Unspecified                                              | 20 | 0.03    |

**eTable 6.** Point Estimates and Associated 95% Confidence Intervals for Temporal Trends in Hospitalizations for Worsening Heart Failure, Overall and Stratified by Left Ventricular Ejection Fraction Category (Corresponding to Manuscript Figures 3 And 4)

| Year                        | Rate per 100 hospitalizations per year (95% CI) |                                       |                                       |                                         |                   |
|-----------------------------|-------------------------------------------------|---------------------------------------|---------------------------------------|-----------------------------------------|-------------------|
|                             | HF as a Principal Discharge Diagnosis           | HF as a Secondary Discharge Diagnosis | WHF among Primary Discharge Diagnoses | WHF among Secondary Discharge Diagnoses | Total WHF         |
| <b>Overall</b>              |                                                 |                                       |                                       |                                         |                   |
| 2010                        | 3.00 (2.93, 3.08)                               | 10.84 (10.71, 10.98)                  | 2.54 (2.47, 2.61)                     | 2.67 (2.60, 2.74)                       | 5.22 (5.12, 5.31) |
| 2011                        | 2.95 (2.87, 3.02)                               | 11.00 (10.86, 11.14)                  | 2.55 (2.48, 2.62)                     | 2.90 (2.83, 2.98)                       | 5.45 (5.35, 5.56) |
| 2012                        | 2.75 (2.67, 2.82)                               | 10.81 (10.67, 10.95)                  | 2.38 (2.31, 2.45)                     | 2.87 (2.80, 2.95)                       | 5.26 (5.15, 5.36) |
| 2013                        | 3.04 (2.97, 3.12)                               | 11.12 (10.98, 11.27)                  | 2.68 (2.61, 2.76)                     | 3.06 (2.98, 3.14)                       | 5.74 (5.64, 5.85) |
| 2014                        | 3.10 (3.02, 3.18)                               | 10.91 (10.76, 11.05)                  | 2.71 (2.64, 2.78)                     | 3.11 (3.03, 3.19)                       | 5.82 (5.71, 5.92) |
| 2015                        | 3.40 (3.32, 3.48)                               | 11.12 (10.98, 11.26)                  | 3.01 (2.94, 3.09)                     | 3.25 (3.18, 3.33)                       | 6.27 (6.16, 6.38) |
| 2016                        | 3.41 (3.33, 3.49)                               | 11.11 (10.97, 11.25)                  | 3.03 (2.96, 3.11)                     | 3.21 (3.13, 3.29)                       | 6.24 (6.14, 6.35) |
| 2017                        | 3.66 (3.58, 3.75)                               | 11.50 (11.36, 11.63)                  | 3.32 (3.24, 3.39)                     | 3.32 (3.24, 3.40)                       | 6.63 (6.53, 6.74) |
| 2018                        | 3.86 (3.78, 3.94)                               | 12.41 (12.27, 12.55)                  | 3.53 (3.45, 3.61)                     | 3.70 (3.62, 3.78)                       | 7.23 (7.11, 7.34) |
| 2019                        | 4.04 (3.96, 4.12)                               | 12.61 (12.46, 12.75)                  | 3.71 (3.63, 3.79)                     | 3.84 (3.76, 3.93)                       | 7.56 (7.44, 7.67) |
| <b>HFrEF (LVEF &lt;40%)</b> |                                                 |                                       |                                       |                                         |                   |
| 2010                        | 1.01 (0.97, 1.06)                               | 2.00 (1.94, 2.06)                     | 0.85 (0.81, 0.90)                     | 0.60 (0.57, 0.64)                       | 1.46 (1.41, 1.51) |
| 2011                        | 0.96 (0.92, 1.01)                               | 1.92 (1.86, 1.98)                     | 0.82 (0.78, 0.86)                     | 0.61 (0.57, 0.64)                       | 1.43 (1.38, 1.48) |
| 2012                        | 0.89 (0.85, 0.94)                               | 1.85 (1.78, 1.91)                     | 0.75 (0.71, 0.79)                     | 0.62 (0.58, 0.65)                       | 1.37 (1.32, 1.42) |
| 2013                        | 0.99 (0.94, 1.03)                               | 1.84 (1.78, 1.90)                     | 0.87 (0.83, 0.91)                     | 0.61 (0.57, 0.64)                       | 1.48 (1.42, 1.53) |
| 2014                        | 1.08 (1.04, 1.13)                               | 1.93 (1.87, 1.99)                     | 0.93 (0.89, 0.97)                     | 0.67 (0.63, 0.71)                       | 1.60 (1.54, 1.66) |
| 2015                        | 1.13 (1.08, 1.17)                               | 1.95 (1.88, 2.01)                     | 0.99 (0.94, 1.03)                     | 0.68 (0.64, 0.72)                       | 1.67 (1.61, 1.72) |
| 2016                        | 1.10 (1.05, 1.15)                               | 1.99 (1.93, 2.06)                     | 0.98 (0.93, 1.02)                     | 0.74 (0.70, 0.77)                       | 1.71 (1.66, 1.77) |
| 2017                        | 1.22 (1.18, 1.27)                               | 2.05 (1.99, 2.11)                     | 1.09 (1.04, 1.13)                     | 0.74 (0.70, 0.78)                       | 1.83 (1.77, 1.89) |
| 2018                        | 1.24 (1.20, 1.29)                               | 2.16 (2.09, 2.22)                     | 1.13 (1.08, 1.17)                     | 0.82 (0.78, 0.86)                       | 1.94 (1.88, 2.00) |
| 2019                        | 1.20 (1.16, 1.25)                               | 1.97 (1.91, 2.03)                     | 1.10 (1.06, 1.15)                     | 0.77 (0.73, 0.81)                       | 1.87 (1.81, 1.93) |
| <b>HFmrEF (LVEF 40-49%)</b> |                                                 |                                       |                                       |                                         |                   |
| 2010                        | 0.35 (0.32, 0.37)                               | 1.00 (0.95, 1.04)                     | 0.30 (0.28, 0.32)                     | 0.28 (0.26, 0.30)                       | 0.58 (0.55, 0.61) |
| 2011                        | 0.37 (0.34, 0.39)                               | 1.11 (1.06, 1.16)                     | 0.32 (0.30, 0.35)                     | 0.32 (0.29, 0.34)                       | 0.64 (0.60, 0.68) |
| 2012                        | 0.33 (0.30, 0.35)                               | 1.19 (1.14, 1.24)                     | 0.29 (0.26, 0.31)                     | 0.34 (0.32, 0.37)                       | 0.63 (0.60, 0.67) |

| Year                     | Rate per 100 hospitalizations per year (95% CI) |                                       |                                       |                                         |                   |
|--------------------------|-------------------------------------------------|---------------------------------------|---------------------------------------|-----------------------------------------|-------------------|
|                          | HF as a Principal Discharge Diagnosis           | HF as a Secondary Discharge Diagnosis | WHF among Primary Discharge Diagnoses | WHF among Secondary Discharge Diagnoses | Total WHF         |
| 2013                     | 0.39 (0.36, 0.42)                               | 1.24 (1.19, 1.30)                     | 0.35 (0.32, 0.37)                     | 0.37 (0.34, 0.40)                       | 0.72 (0.68, 0.76) |
| 2014                     | 0.40 (0.37, 0.43)                               | 1.22 (1.17, 1.27)                     | 0.35 (0.32, 0.38)                     | 0.40 (0.37, 0.43)                       | 0.75 (0.71, 0.79) |
| 2015                     | 0.44 (0.41, 0.47)                               | 1.25 (1.20, 1.30)                     | 0.39 (0.37, 0.42)                     | 0.41 (0.38, 0.44)                       | 0.80 (0.76, 0.84) |
| 2016                     | 0.42 (0.39, 0.45)                               | 1.30 (1.25, 1.35)                     | 0.37 (0.35, 0.40)                     | 0.39 (0.36, 0.42)                       | 0.76 (0.72, 0.80) |
| 2017                     | 0.48 (0.45, 0.51)                               | 1.37 (1.32, 1.42)                     | 0.45 (0.42, 0.47)                     | 0.39 (0.37, 0.42)                       | 0.84 (0.80, 0.88) |
| 2018                     | 0.49 (0.46, 0.52)                               | 1.55 (1.50, 1.61)                     | 0.44 (0.41, 0.47)                     | 0.47 (0.44, 0.50)                       | 0.92 (0.87, 0.96) |
| 2019                     | 0.52 (0.49, 0.55)                               | 1.55 (1.50, 1.61)                     | 0.49 (0.46, 0.52)                     | 0.49 (0.46, 0.52)                       | 0.98 (0.94, 1.02) |
| <b>HFpEF (LVEF ≥50%)</b> |                                                 |                                       |                                       |                                         |                   |
| 2010                     | 1.33 (1.28, 1.38)                               | 5.18 (5.08, 5.28)                     | 1.15 (1.10, 1.19)                     | 1.41 (1.36, 1.46)                       | 2.56 (2.49, 2.62) |
| 2011                     | 1.28 (1.23, 1.33)                               | 5.26 (5.16, 5.36)                     | 1.13 (1.08, 1.18)                     | 1.55 (1.49, 1.60)                       | 2.68 (2.60, 2.75) |
| 2012                     | 1.29 (1.24, 1.34)                               | 5.35 (5.25, 5.45)                     | 1.16 (1.11, 1.20)                     | 1.60 (1.54, 1.66)                       | 2.75 (2.68, 2.83) |
| 2013                     | 1.43 (1.38, 1.48)                               | 5.62 (5.52, 5.73)                     | 1.28 (1.23, 1.33)                     | 1.77 (1.71, 1.83)                       | 3.04 (2.97, 3.12) |
| 2014                     | 1.40 (1.35, 1.46)                               | 5.44 (5.33, 5.54)                     | 1.26 (1.21, 1.32)                     | 1.73 (1.67, 1.79)                       | 3.00 (2.92, 3.07) |
| 2015                     | 1.61 (1.55, 1.67)                               | 5.54 (5.44, 5.64)                     | 1.46 (1.40, 1.51)                     | 1.84 (1.78, 1.90)                       | 3.30 (3.22, 3.38) |
| 2016                     | 1.68 (1.63, 1.74)                               | 5.59 (5.49, 5.69)                     | 1.52 (1.46, 1.57)                     | 1.79 (1.73, 1.85)                       | 3.31 (3.23, 3.39) |
| 2017                     | 1.75 (1.69, 1.81)                               | 5.95 (5.85, 6.05)                     | 1.60 (1.55, 1.66)                     | 1.89 (1.84, 1.95)                       | 3.50 (3.42, 3.57) |
| 2018                     | 1.90 (1.84, 1.96)                               | 6.45 (6.34, 6.56)                     | 1.75 (1.69, 1.81)                     | 2.09 (2.03, 2.16)                       | 3.85 (3.76, 3.93) |
| 2019                     | 1.93 (1.88, 1.99)                               | 6.44 (6.34, 6.55)                     | 1.79 (1.73, 1.84)                     | 2.12 (2.06, 2.19)                       | 3.91 (0.00, 0.00) |
| <b>Unknown EF</b>        |                                                 |                                       |                                       |                                         |                   |
| 2010                     | 0.31 (0.29, 0.34)                               | 2.67 (2.59, 2.74)                     | 0.24 (0.22, 0.27)                     | 0.38 (0.35, 0.41)                       | 0.62 (0.59, 0.66) |
| 2011                     | 0.34 (0.31, 0.36)                               | 2.71 (2.63, 2.78)                     | 0.28 (0.25, 0.30)                     | 0.43 (0.40, 0.46)                       | 0.71 (0.67, 0.74) |
| 2012                     | 0.24 (0.21, 0.26)                               | 2.42 (2.35, 2.49)                     | 0.19 (0.17, 0.21)                     | 0.31 (0.29, 0.34)                       | 0.50 (0.47, 0.53) |
| 2013                     | 0.24 (0.22, 0.26)                               | 2.41 (2.34, 2.48)                     | 0.19 (0.17, 0.21)                     | 0.31 (0.29, 0.34)                       | 0.50 (0.47, 0.53) |
| 2014                     | 0.21 (0.19, 0.23)                               | 2.32 (2.25, 2.39)                     | 0.16 (0.14, 0.18)                     | 0.31 (0.28, 0.33)                       | 0.47 (0.44, 0.50) |
| 2015                     | 0.22 (0.20, 0.24)                               | 2.38 (2.31, 2.45)                     | 0.18 (0.16, 0.20)                     | 0.32 (0.30, 0.35)                       | 0.50 (0.47, 0.53) |
| 2016                     | 0.21 (0.19, 0.23)                               | 2.23 (2.16, 2.29)                     | 0.17 (0.15, 0.18)                     | 0.29 (0.27, 0.32)                       | 0.46 (0.43, 0.49) |
| 2017                     | 0.21 (0.19, 0.23)                               | 2.13 (2.07, 2.19)                     | 0.18 (0.16, 0.20)                     | 0.29 (0.27, 0.31)                       | 0.47 (0.44, 0.50) |
| 2018                     | 0.23 (0.21, 0.25)                               | 2.25 (2.19, 2.31)                     | 0.21 (0.19, 0.23)                     | 0.31 (0.29, 0.34)                       | 0.52 (0.49, 0.55) |
| 2019                     | 0.38 (0.35, 0.41)                               | 2.64 (2.57, 2.71)                     | 0.34 (0.31, 0.36)                     | 0.45 (0.43, 0.48)                       | 0.79 (0.00, 0.00) |

**eFigure 1.** Major Diagnostic Categories for the Principal Discharge Diagnosis for Admissions With Heart Failure as a Secondary Discharge Diagnosis Identified as Meeting the Definition for Worsening Heart Failure

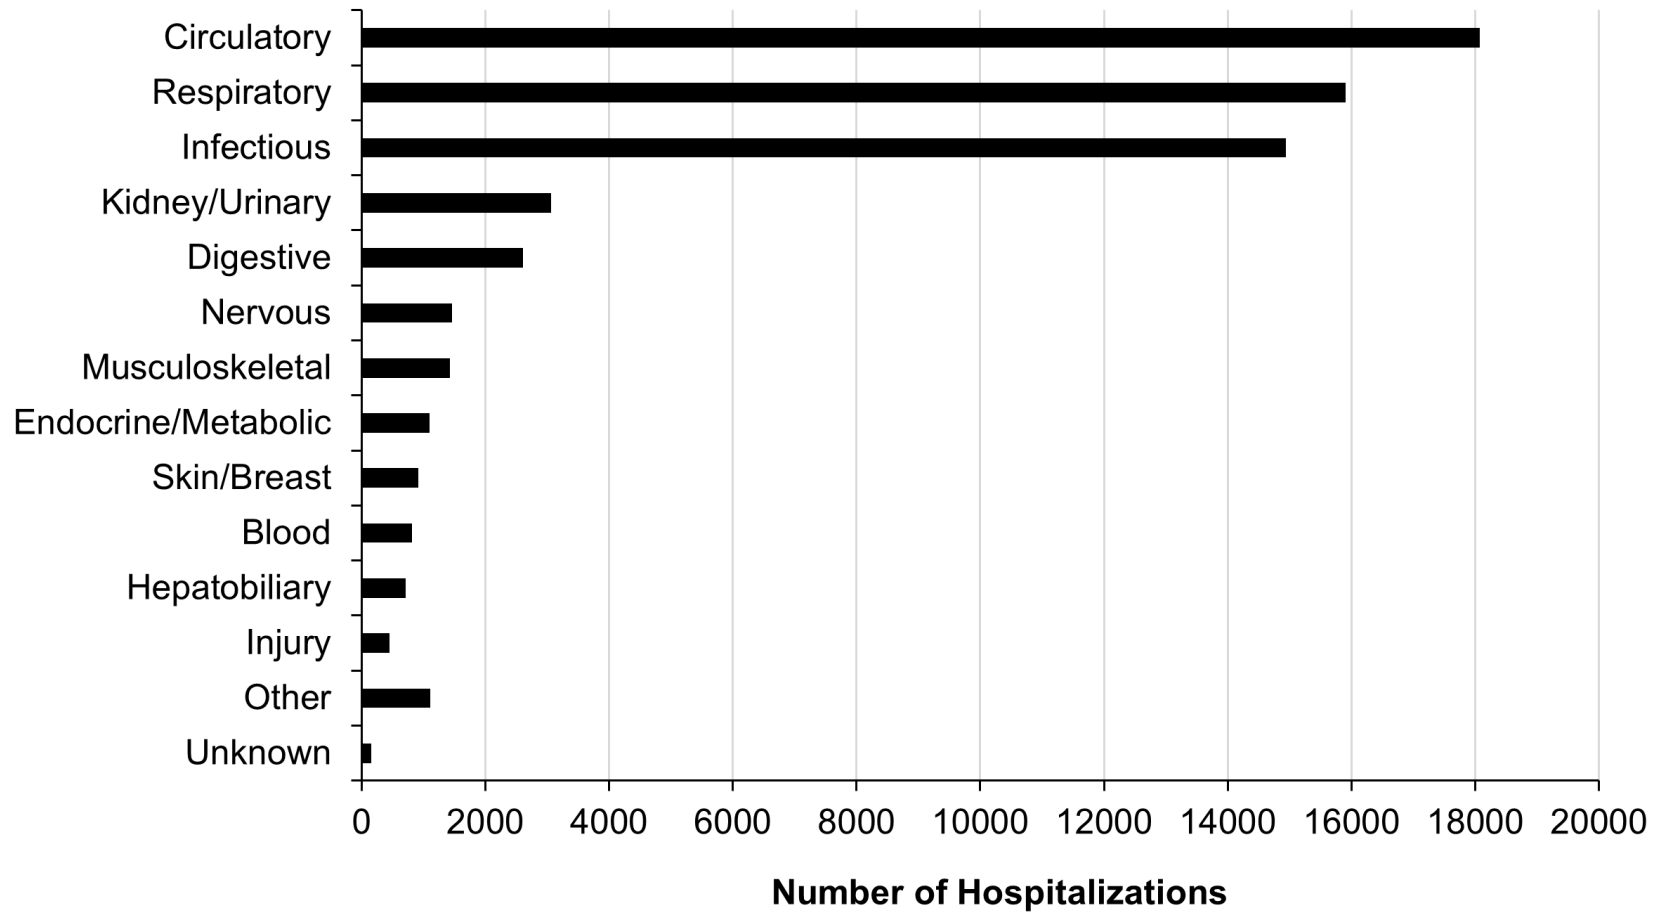

**eFigure 2.** Temporal Trends in Hospitalizations for Heart Failure Based on Principal Discharge Diagnosis and Diagnostic Criteria for Worsening Heart Failure for (A) Heart Failure With an Ejection Fraction Between 40-60% and (B) Heart Failure With and Ejection Fraction  $\geq 60\%$

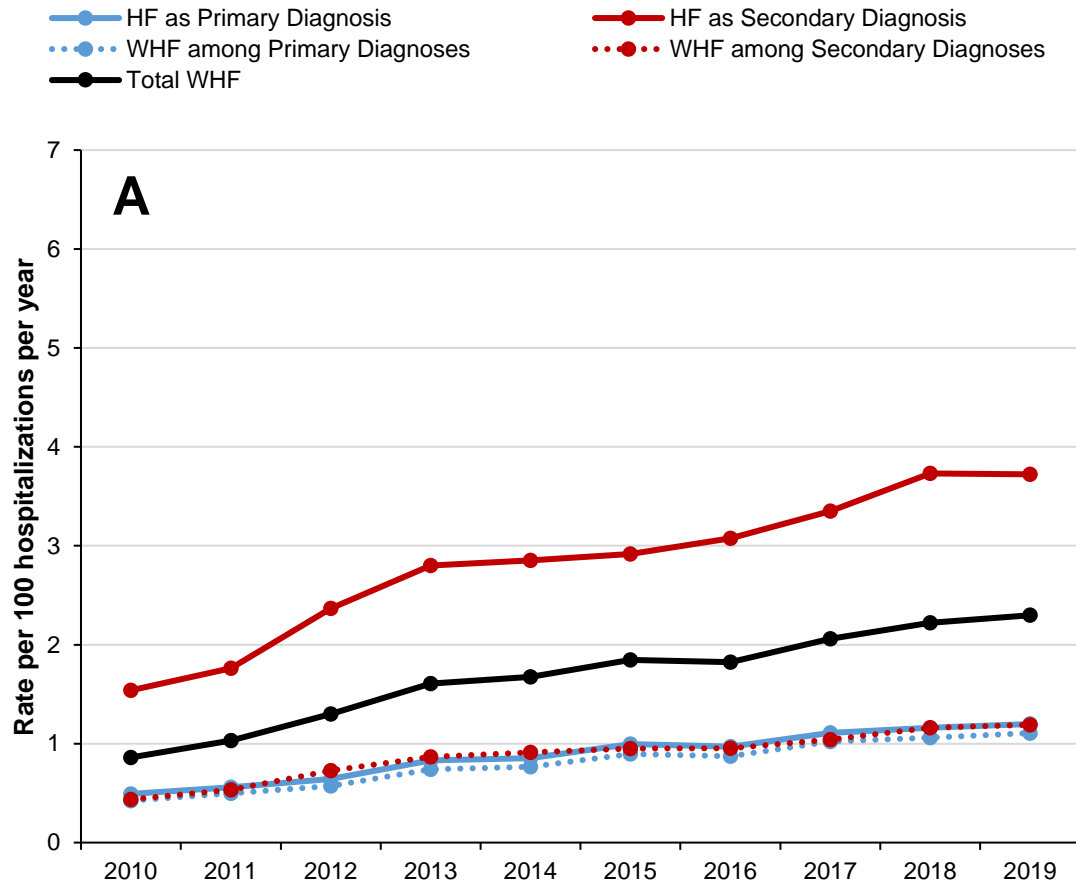



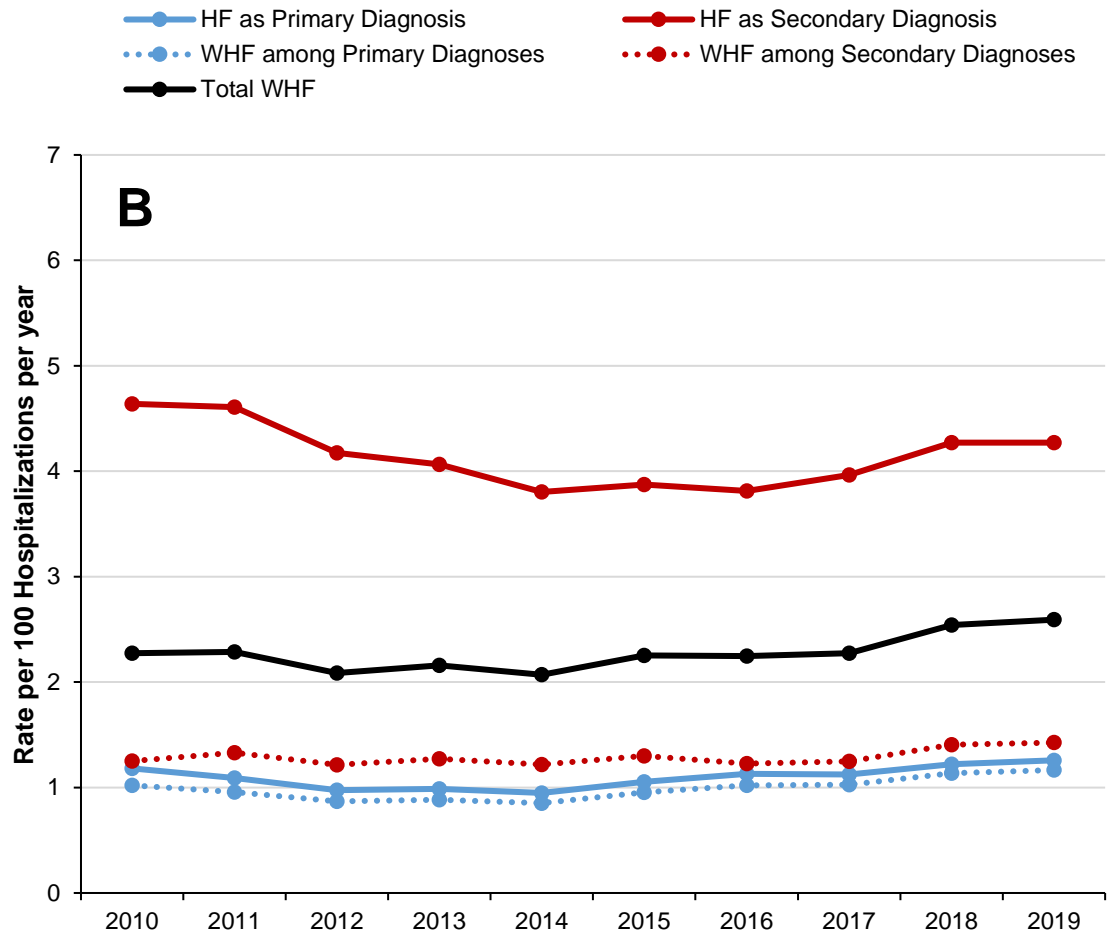

**eFigure 3.** All-Cause and Cause-Specific Readmission Rates Based on Principal Discharge Diagnosis and Diagnostic Criteria for Worsening Heart Failure

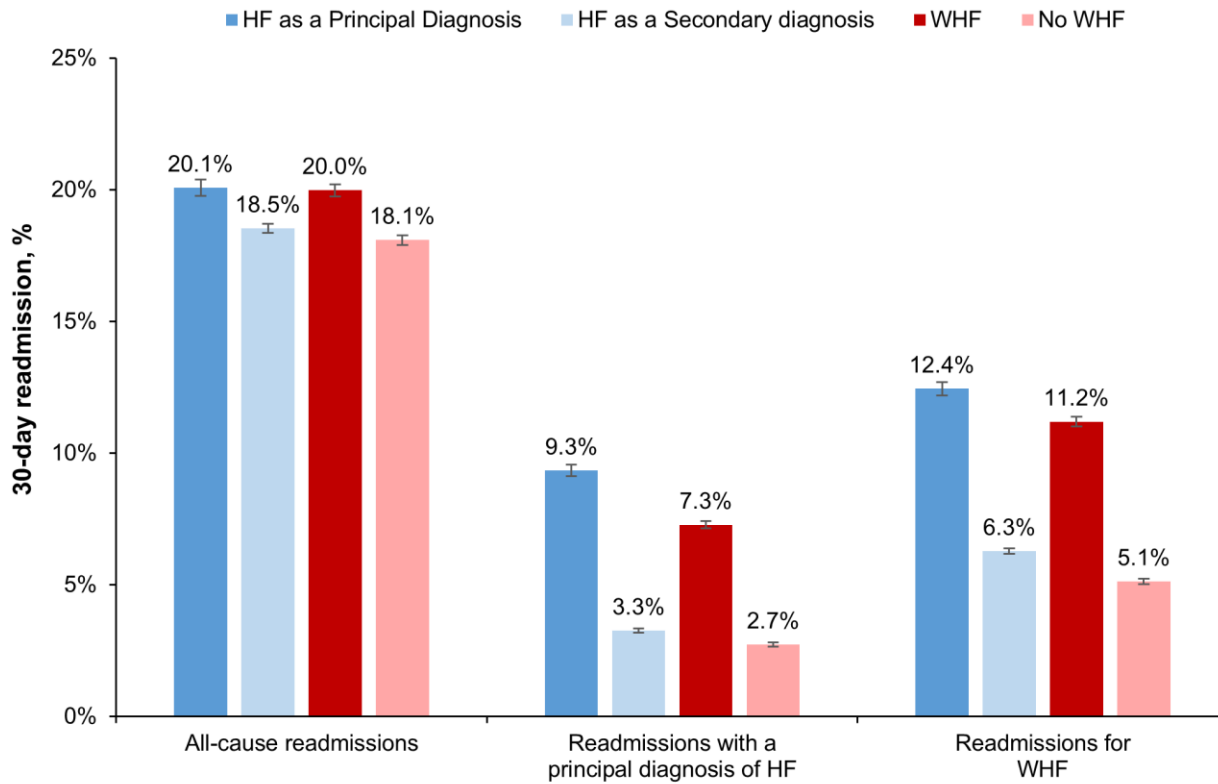

**Abbreviations:** HF = heart failure; WHF = worsening heart failure.

| 30-day readmission type                       | Overall Hospitalizations (N=287,992) | Principal Discharge Diagnosis (N=65,357) | Secondary Discharge Diagnosis (N=222,635) | Worsening Heart Failure (N=120,806) | No Worsening Heart Failure (N=167,186) |
|-----------------------------------------------|--------------------------------------|------------------------------------------|-------------------------------------------|-------------------------------------|----------------------------------------|
| All-cause readmissions                        | 18.9 (18.7-19.0)                     | 20.1 (19.8-20.4)                         | 18.5 (18.4-18.7)                          | 20.0 (19.8-20.2)                    | 18.1 (17.9-18.3)                       |
| Readmissions with a principal diagnosis of HF | 4.6 (4.6-4.7)                        | 9.3 (9.1-9.6)                            | 3.3 (3.2-3.3)                             | 7.3 (7.1-7.4)                       | 2.7 (2.7-2.8)                          |
| Readmissions for worsening heart failure      | 7.7 (7.6-7.8)                        | 12.4 (12.2-12.7)                         | 6.3 (6.2-6.4)                             | 11.2 (11.0-11.4)                    | 5.1 (5.0-5.2)                          |
